# Supplementary material
Source: MDPI journal article supplement (https://www.mdpi.com/2411-5134/6/1/8)
Supplement: s1 [file s1]

## Measurement of Multiple Cardiac Performance Endpoints in Daphnia and Zebrafish by Kymograph

Kevin Adi Kurnia 1#, Ferry Saputra 1#, Marri Jmelou M. Roldan 2, Agnes L. Castillo 3, Jong-Chin Huang 4, Kelvin H.-C. Chen 4 \*, Hong-Thih Lai 5\* and Chung-Der Hsiao 1,6,7\*

1. Department of Bioscience Technology, Chung Yuan Christian University, Chung-Li, 320314, Taiwan
2. Faculty of Pharmacy and The Graduate School, University of Santo Tomas, Manila, 1008 Philippines
3. Faculty of Pharmacy, The Graduate School and Research Center for the Natural and Applied Sciences, University of Santo Tomas, Manila 1008 Philippines
4. Department of Applied Chemistry, National Pingtung University, Pingtung 900391, Taiwan
5. Department of Aquatic Biosciences, National Chiayi University, 300 University Rd., Chiayi 60004, Taiwan
6. Center for Nanotechnology, Chung Yuan Christian University, Chung-Li 320314, Taiwan
7. Department of Chemistry, Chung Yuan Christian University, Chung-Li, 320314, Taiwan

# equal contribution authors

\* corresponding to: Kelvin H.-C. Chen ([kelvin@mail.nptu.edu.tw](mailto:kelvin@mail.nptu.edu.tw)); Hong-Thih Lai ([htlai@mail.ncyu.edu.tw](mailto:htlai@mail.ncyu.edu.tw)); Chung-Der Hsiao ([cdhsiao@cycu.edu.tw](mailto:cdhsiao@cycu.edu.tw))

# Introduction of kymograph

- A 2D plot of time versus space created from time-lapse images (videos)
- Display actual velocity of the time-lapse
- Usually used for microtubule movement, heartbeat, etc (observing motility)

# The analysis pipeline of this study

## Image process

Video tapping **@ 200 fps** for heartbeat

Video format conversion to **avi format**

Video stabilization using **Image Stabilizer** plugin (**optional**)

## Information extraction

Use Kymograph plugin in ImageJ to analyze **cardiac rhythm**

Result **plotting, smoothening, and interval detection** in ImageJ using **BAR Plugin**

Data calculation using **Microsoft Excel 2016**

## Obtainable Parameters

- Heart rate
- Heartbeat interval
- Fractional Shortening
- Ejection Fraction
- Stroke Volume
- Cardiac Output
- Heartbeat regularity

**Zebrafish**

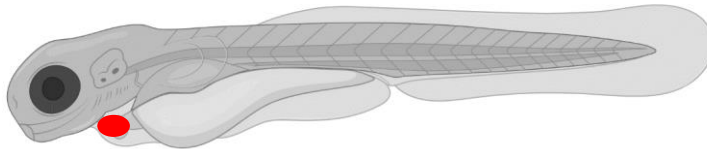

**Daphnia**

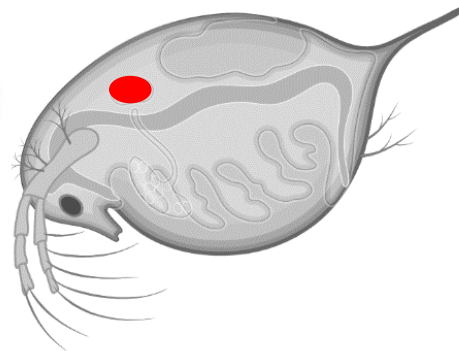

# Video recording

- Video recording was done using high speed CCD
- Video recording that can be used for kymograph can be obtained from inverted microscope using HiBestViewer Application (AZ Instrument, Taiwan)

# Video Recording using HiBestViewer Application

(AZ Instrument, Taiwan)

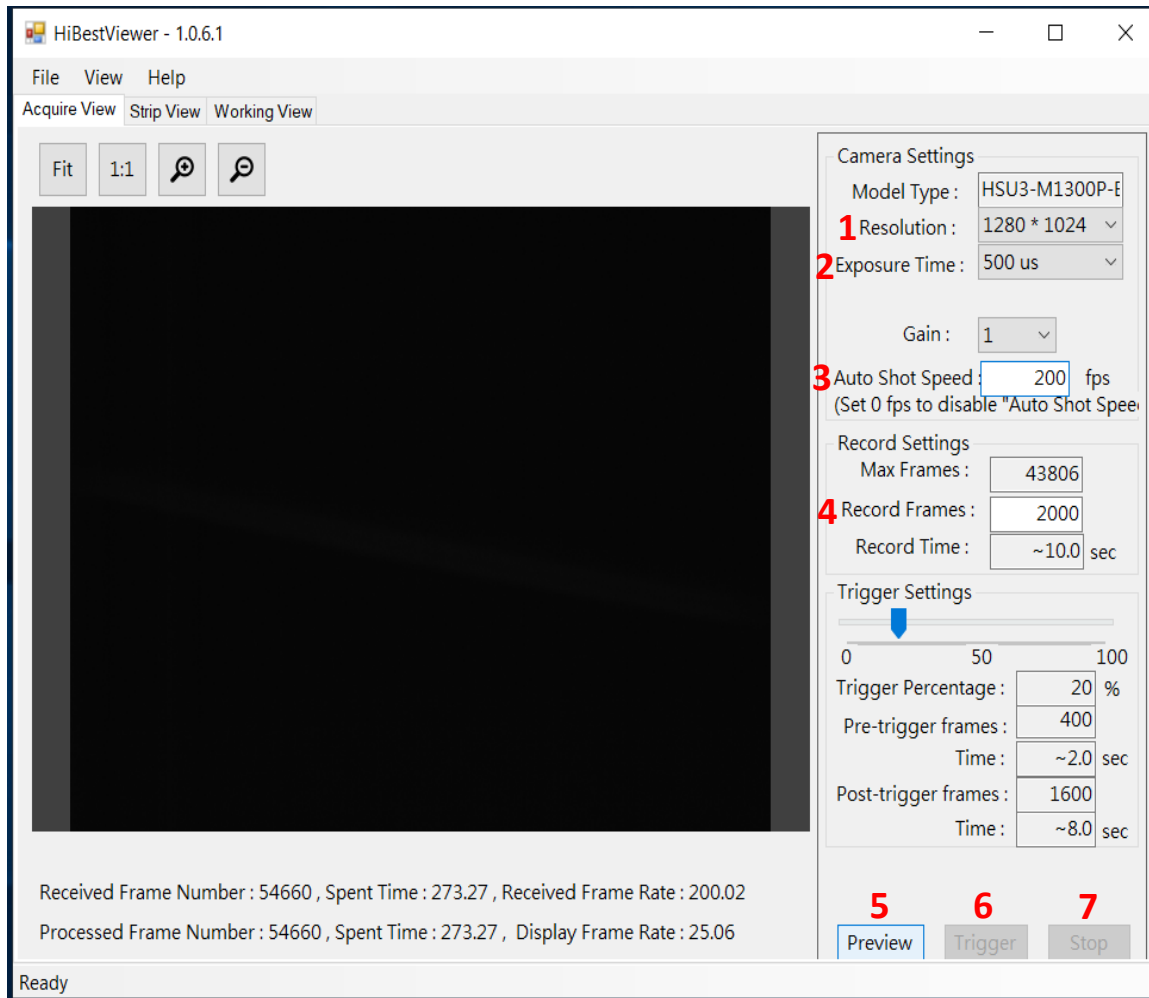

1. **Resolution** : Size of the video taken with a linear correlation to sharpness and clarity.
2. **Exposure time** : duration of time in which the sensor within the camera exposed to light
3. **Auto Shot Speed** : number of frames taken in one second for the recording (fps)
4. **Record Frame** : Number of frame set manually by the user to determine the recording length. The final duration of the video is presented in **Record Time**. This number cannot exceed the **Max Frames** or **0**.
5. **Preview** : Start viewing the current condition of the object of interest under the microscope.
6. **Trigger** : Start recording after preview
7. **Stop** : Stop the recording or the viewing.

# Video conversion using VirtualDub

.mp4 video must be converted to .avi to be recognized by ImageJ

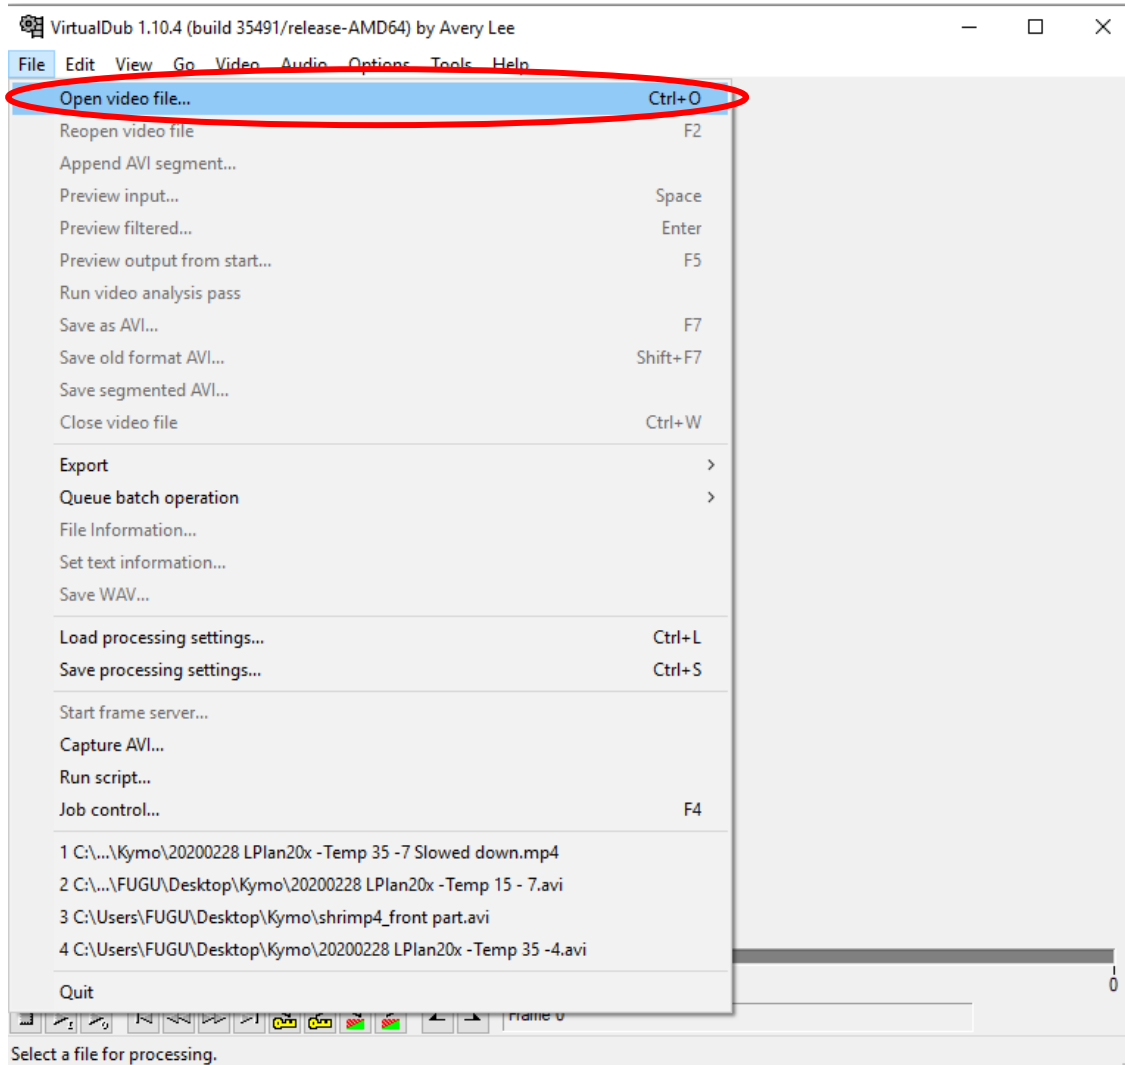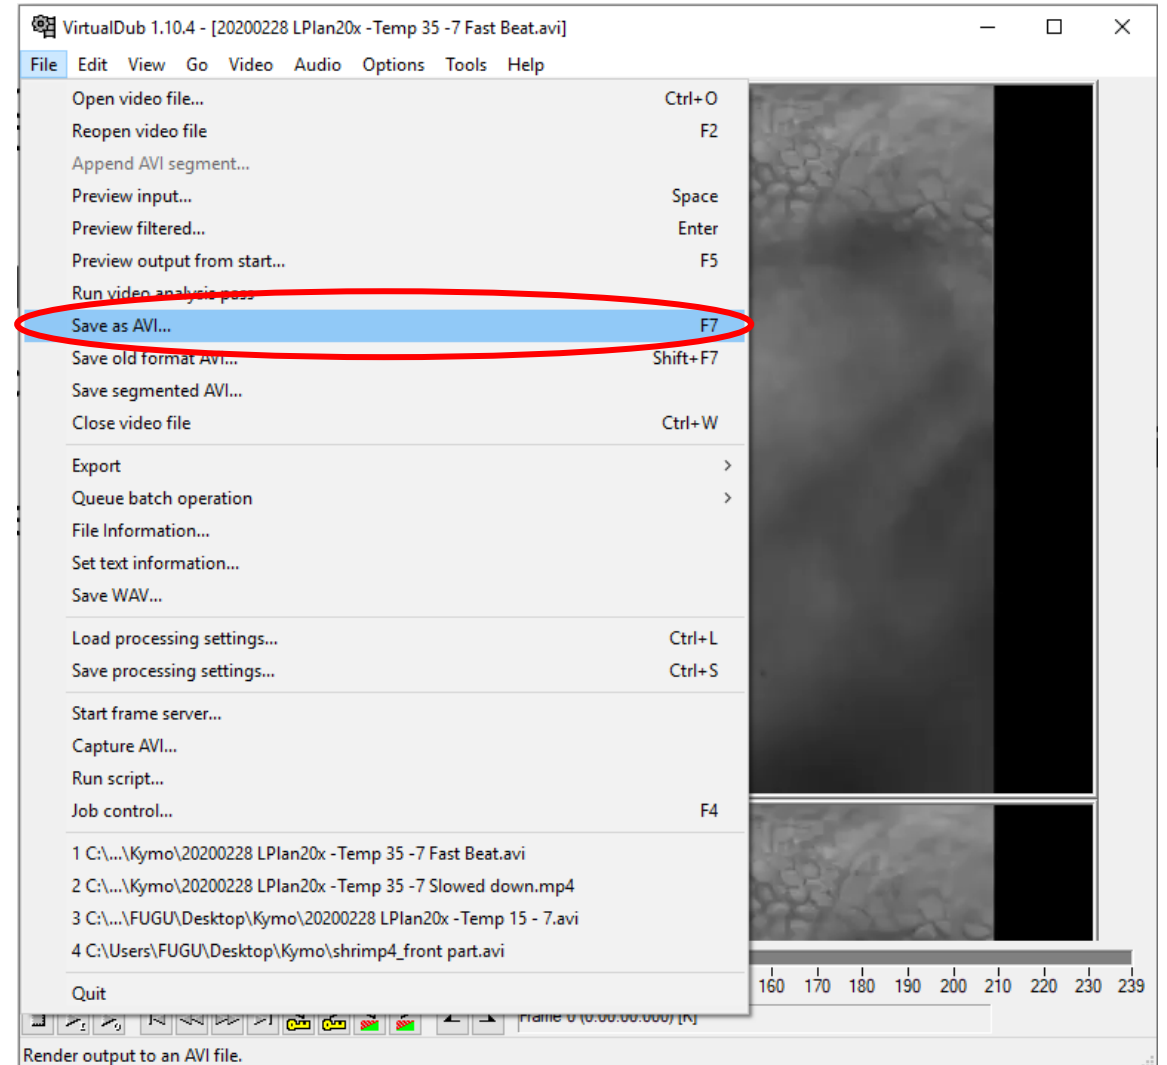

# Outline

- Kymograph generation using ImageJ  and Zebrafish Heartbeat
- Image Stabilizer (Optional)
- Data Collection using **BAR Plugin**
- Data Calculation in Microsoft Excel
- Included macro

# Kymograph creation

Manually determine and draw a line from the center to the outermost location of Region of Interest (ROI).

(We use zebrafish heart as the ROI for this example)

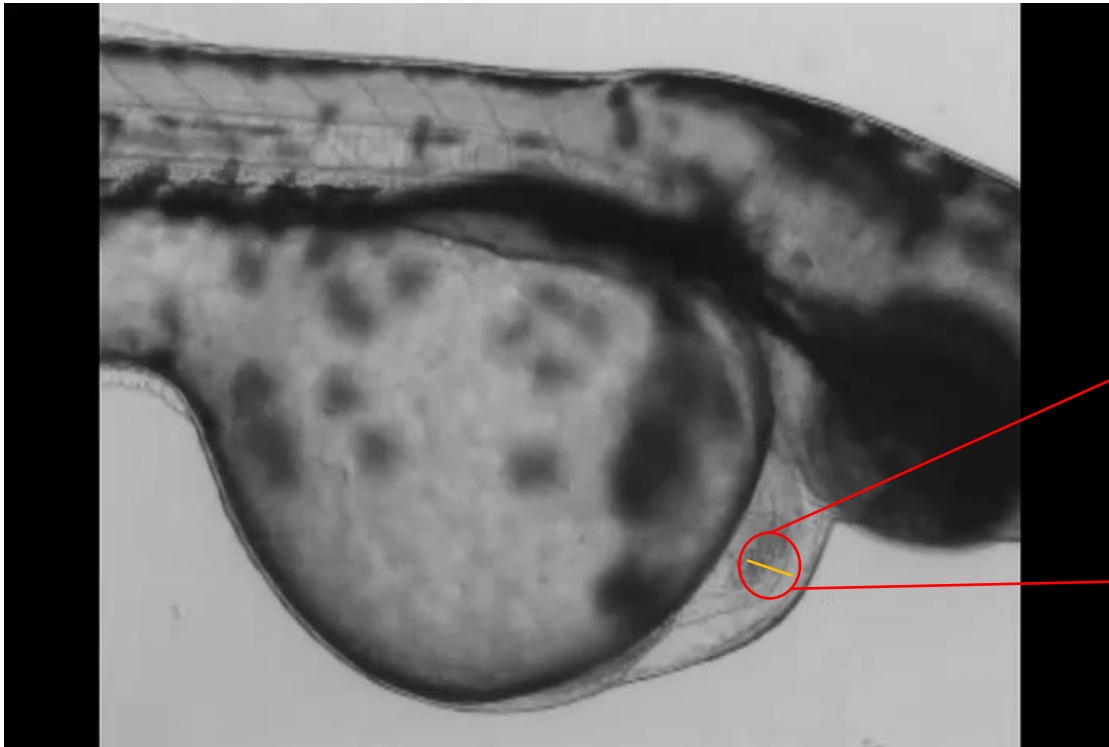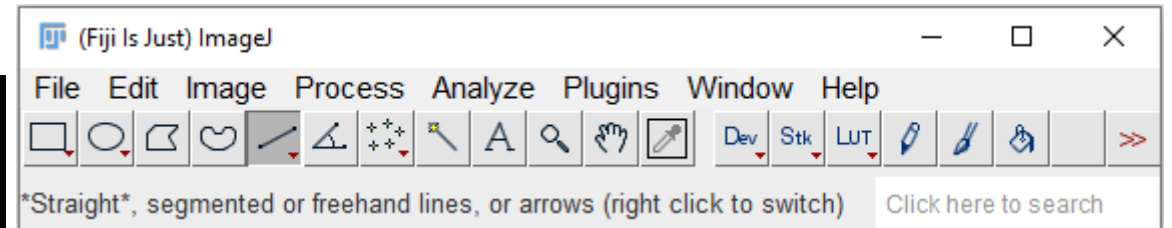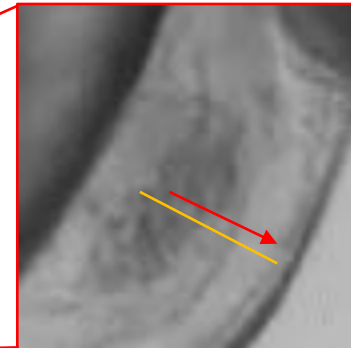



- Use Dynamic Reslice (*Image > Stacks > Dynamic Reslice > Rotate 90 degrees*) to create Kymograph

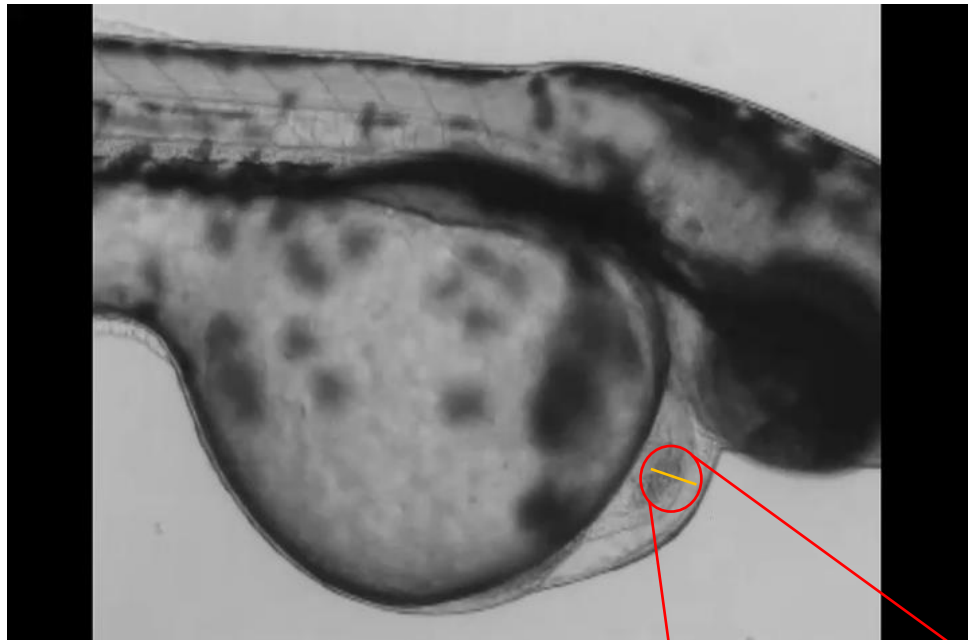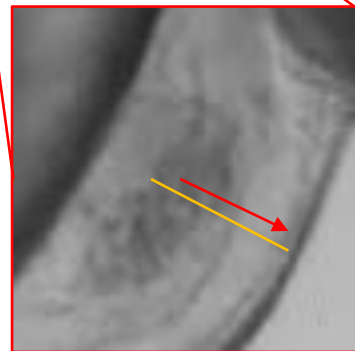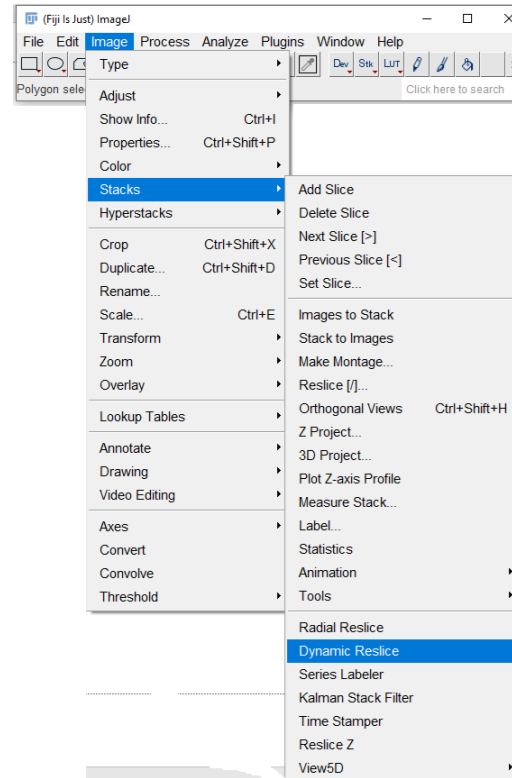

**Resulting Kymograph**

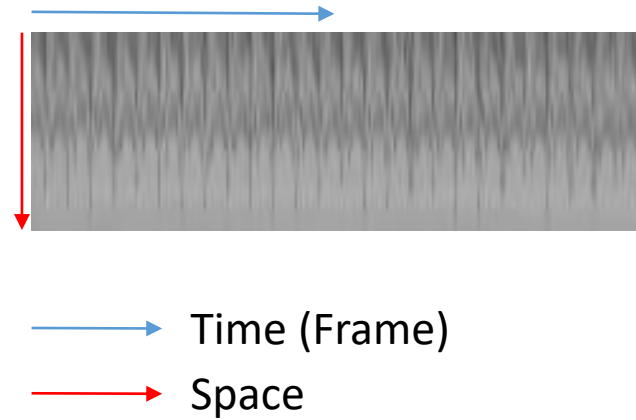

# Result example

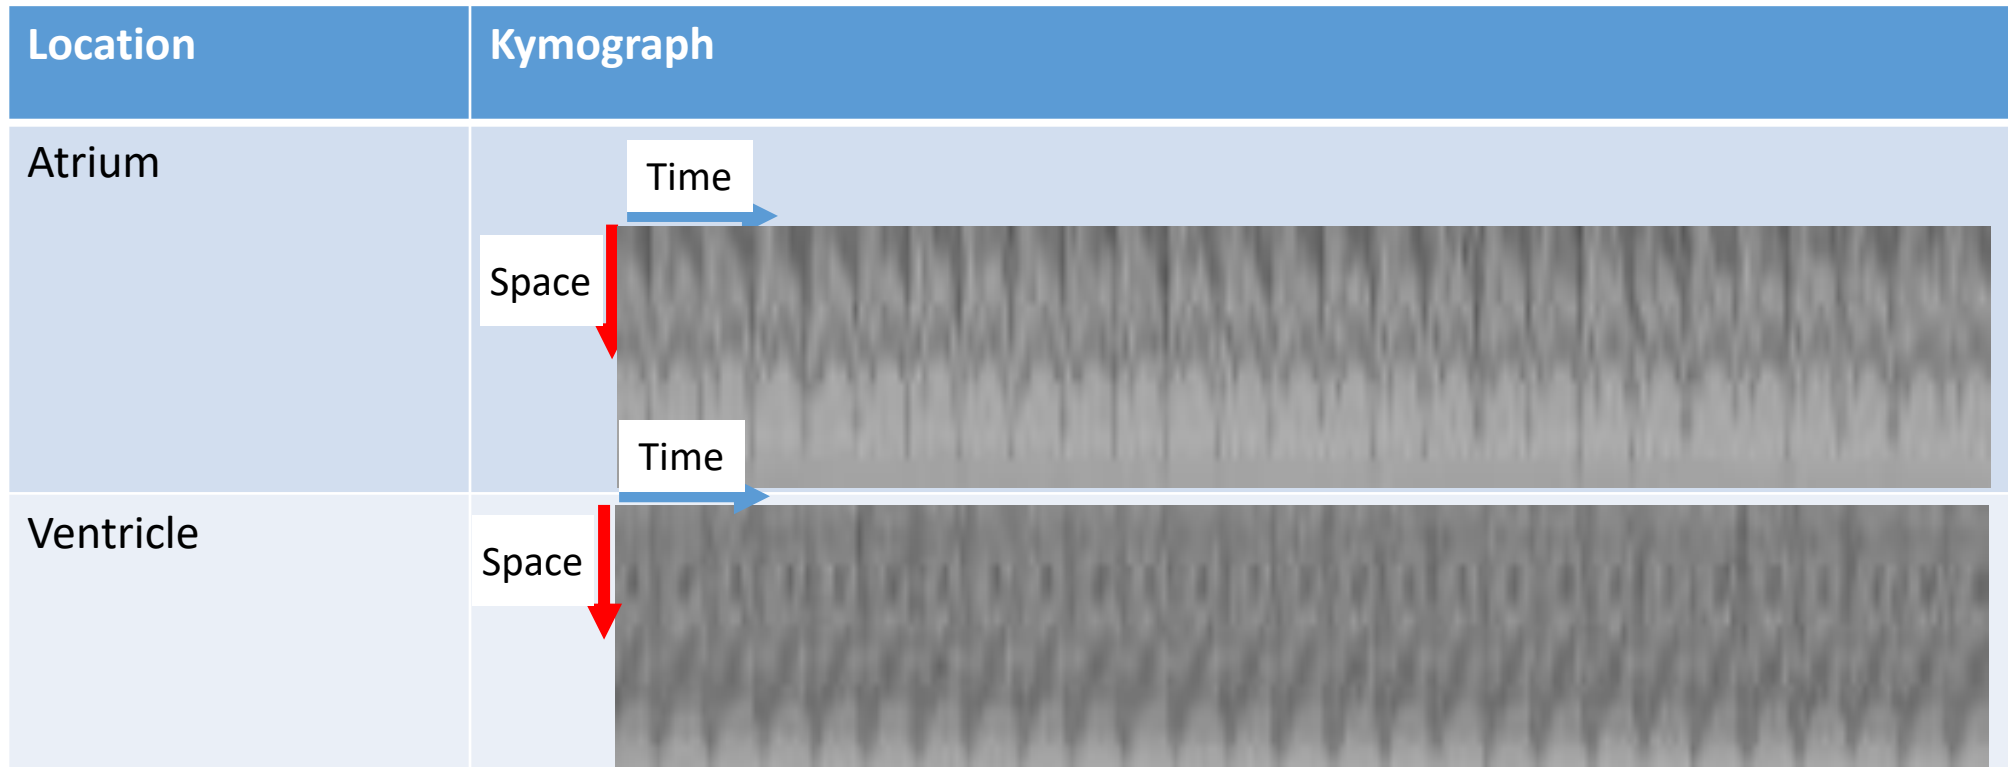

Time: Frame of the Video

Space: Distance of the Line

# Editing

Resulting kymograph image contrast can be edited by using Brightness/Contrast (*Image > Adjust > Brightness/Contrast*)

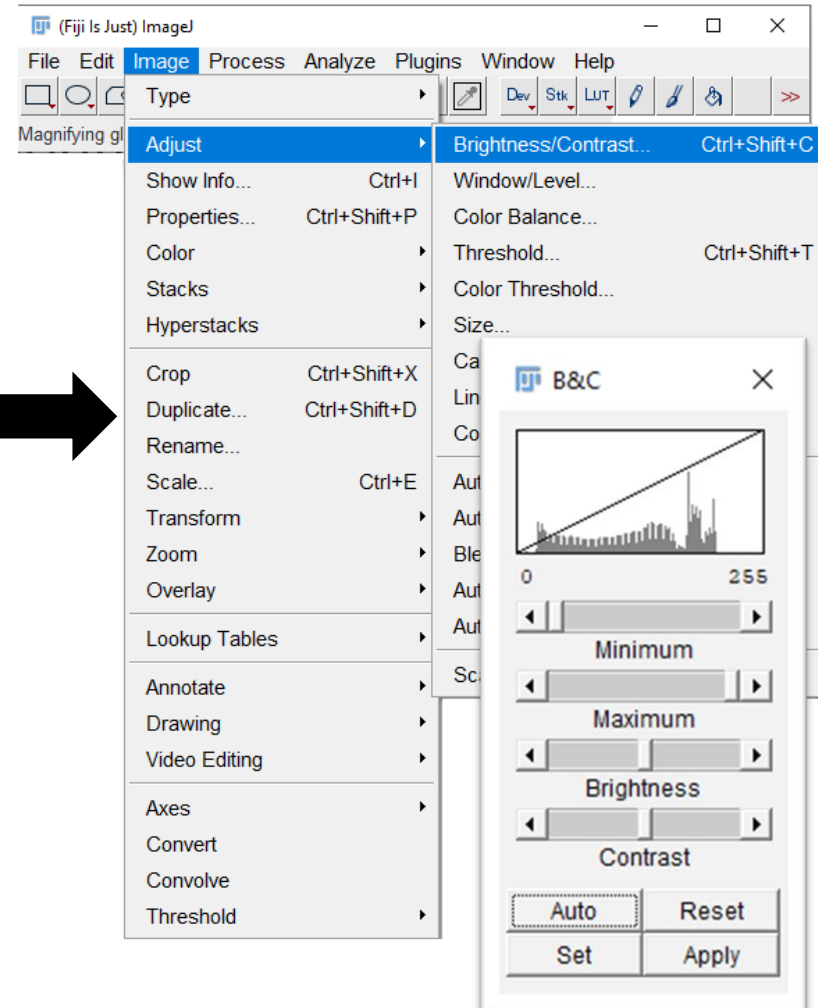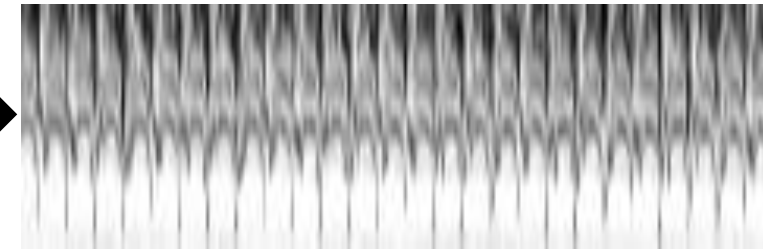

# Editing cont.

Or by using Find Edges (*Process > Find Edges*)

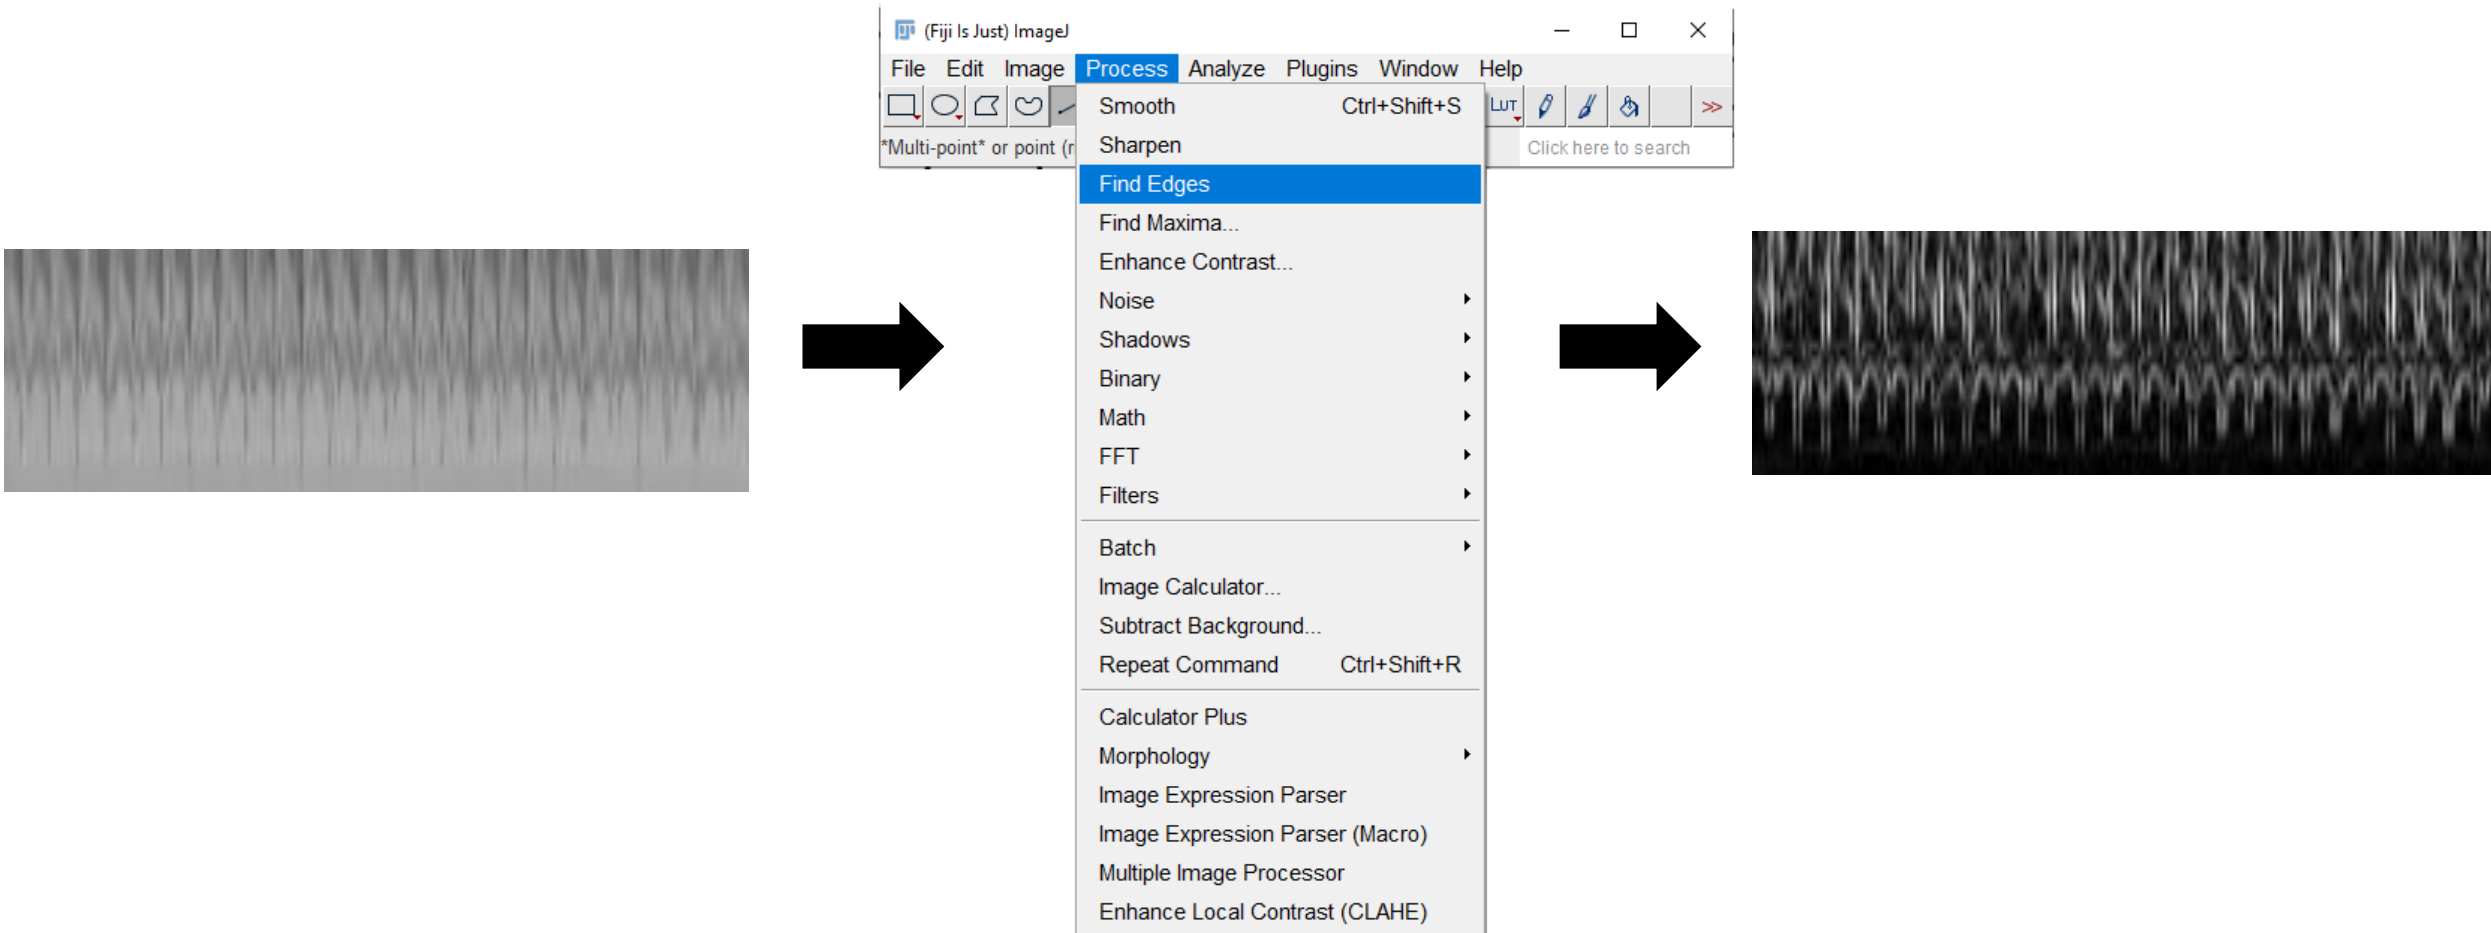

# Edited Result example

| Location  | Kymograph                                                                           |  |
|-----------|-------------------------------------------------------------------------------------|--|
| Atrium    |   |  |
| Ventricle |  |  |

Time: Frame of the Video  
Space: Distance of the Line

# Image Stabilizer

- Image Stabilizer plugin is used for stabilizing ROI movement in the video.
- This process is optional as not all video has moving ROI that might interfere with the data collection.
- The Image was processed using Lucas-Kanade Algorithm
- The plugin can be downloaded from [http://www.cs.cmu.edu/~kangli/code/Image\\_Stabilizer.html](http://www.cs.cmu.edu/~kangli/code/Image_Stabilizer.html)<sup>1</sup>

<sup>1</sup>K. Li, "The image stabilizer plugin for ImageJ," [http://www.cs.cmu.edu/~kangli/code/Image\\_Stabilizer.html](http://www.cs.cmu.edu/~kangli/code/Image_Stabilizer.html), February, 2008.

# Image Stabilizer

- Open the video in ImageJ without ticking the Virtual Stack box in order to keep the video for use.

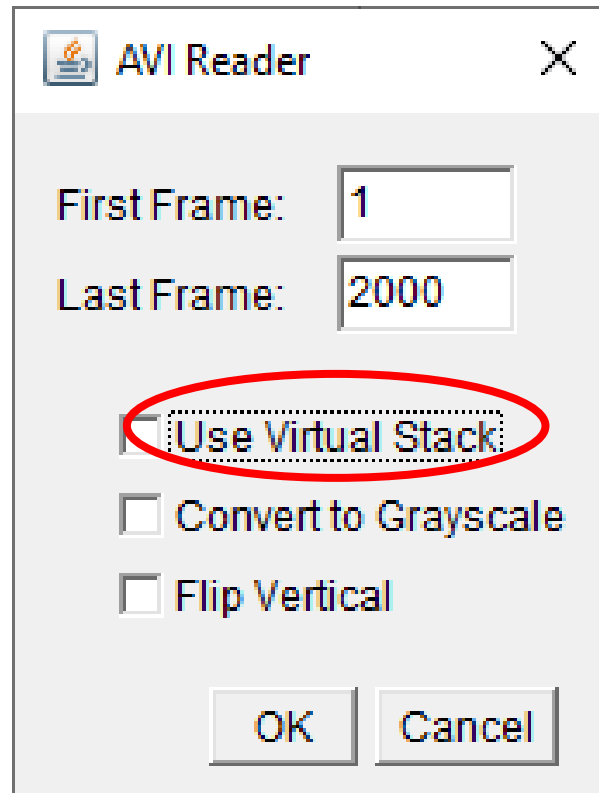

# Image Stabilizer

- Run the Image Stabilizer Plugin (Plugins > Image Stabilizer).
- Move the video slider to the middle of the video duration, because the algorithm will stabilize the video using the selected frame as a template.

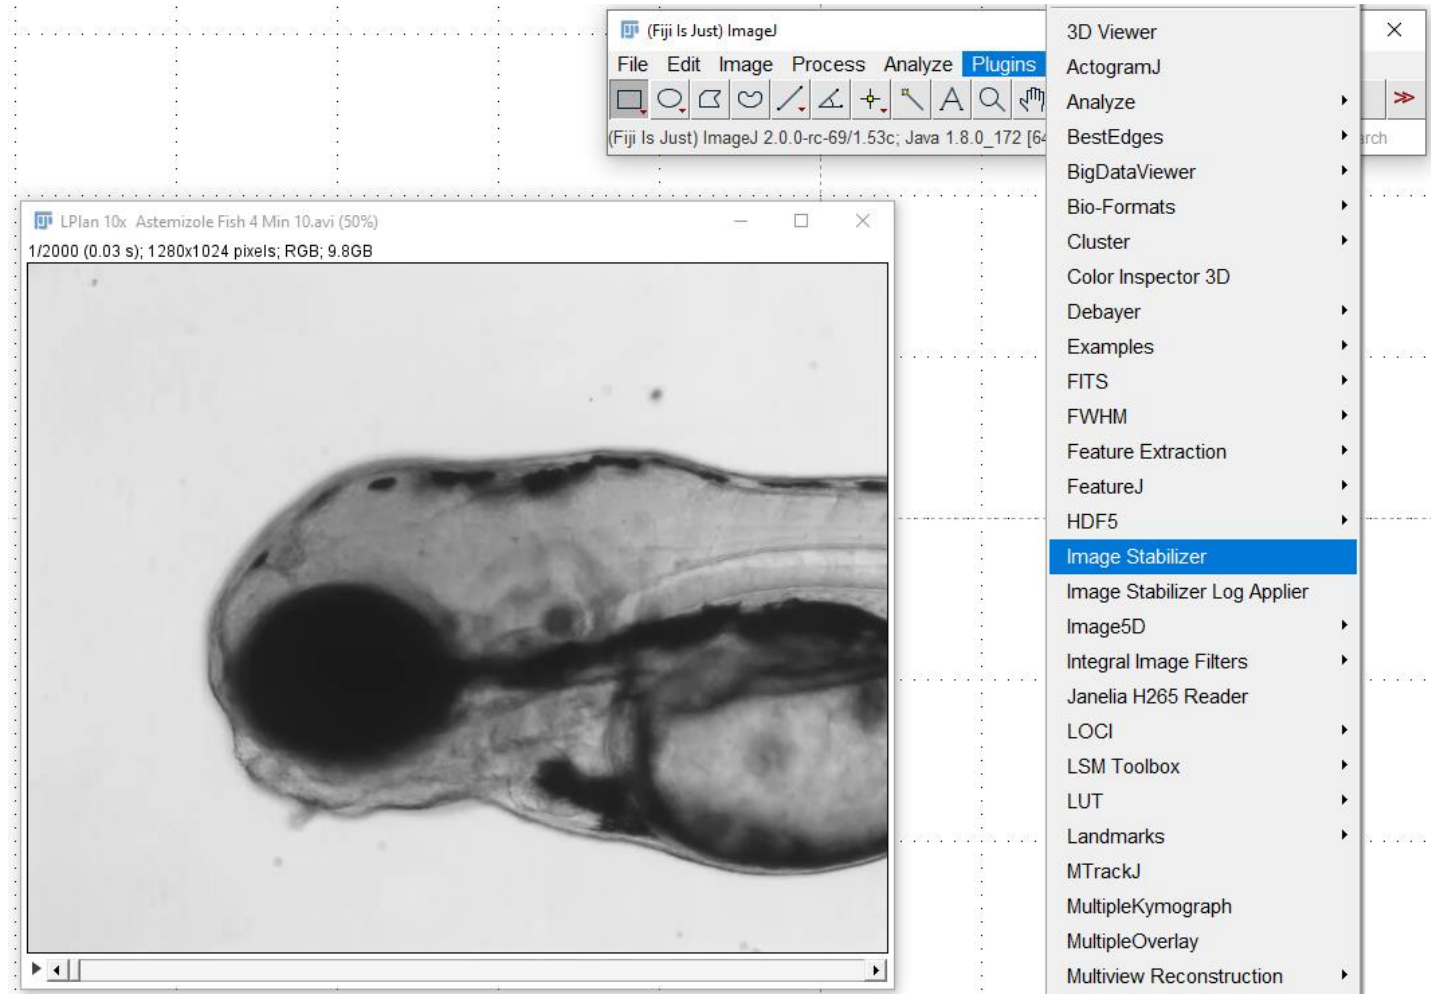



# Image Stabilizer

- Popup window will open for Image Stabilizer settings. However we usually just left the settings as is, then click OK.
- Then wait for the stabilizing process to finish.
- Stabilizing process can be repeated until desired condition is reached.

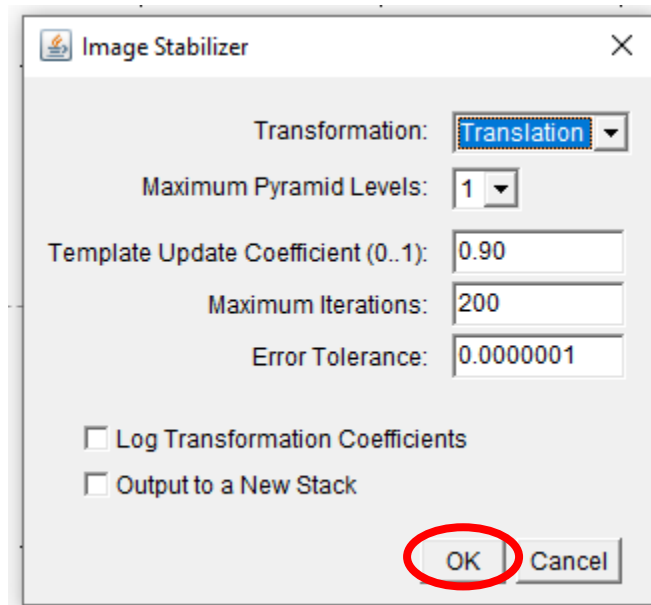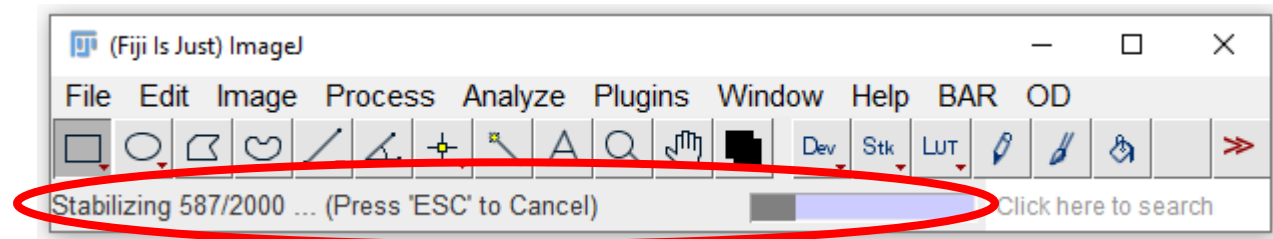

# Image Stabilizer Result

Before

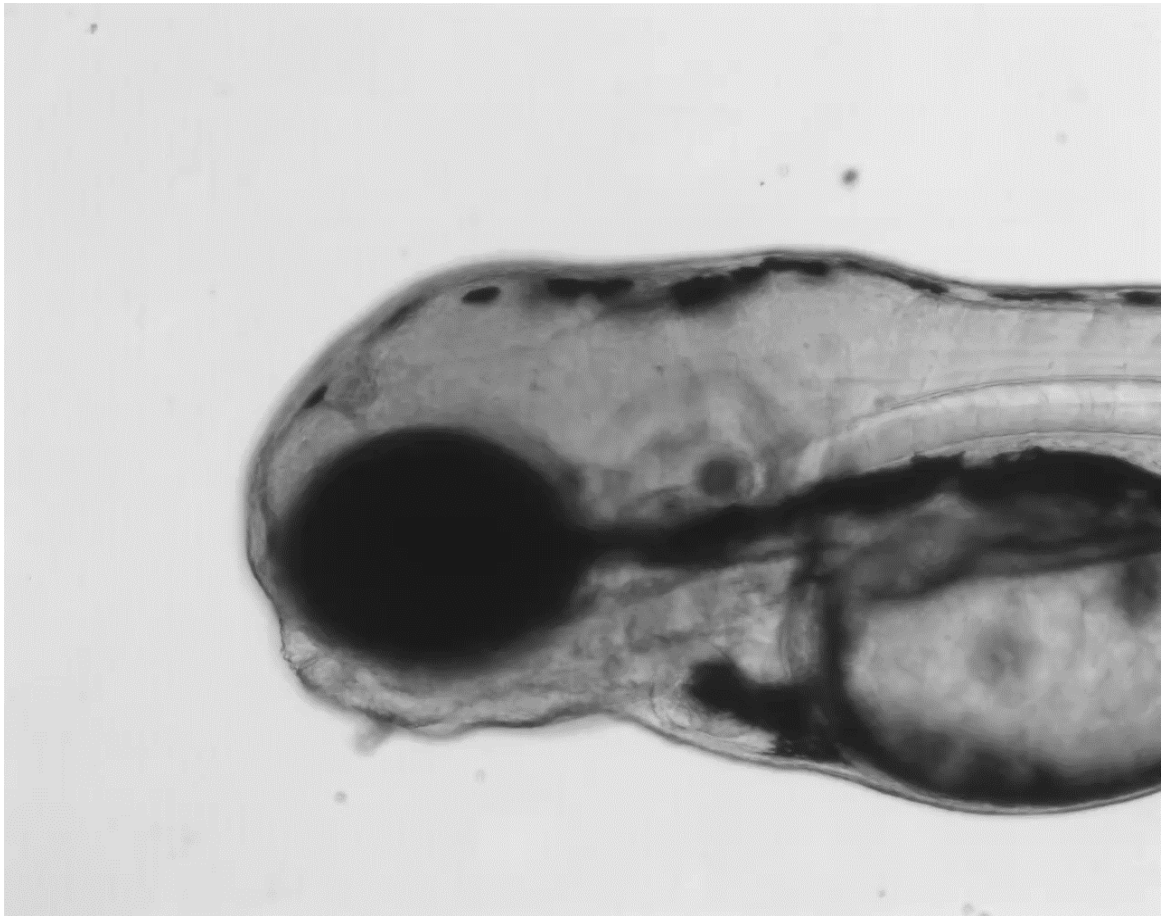

After

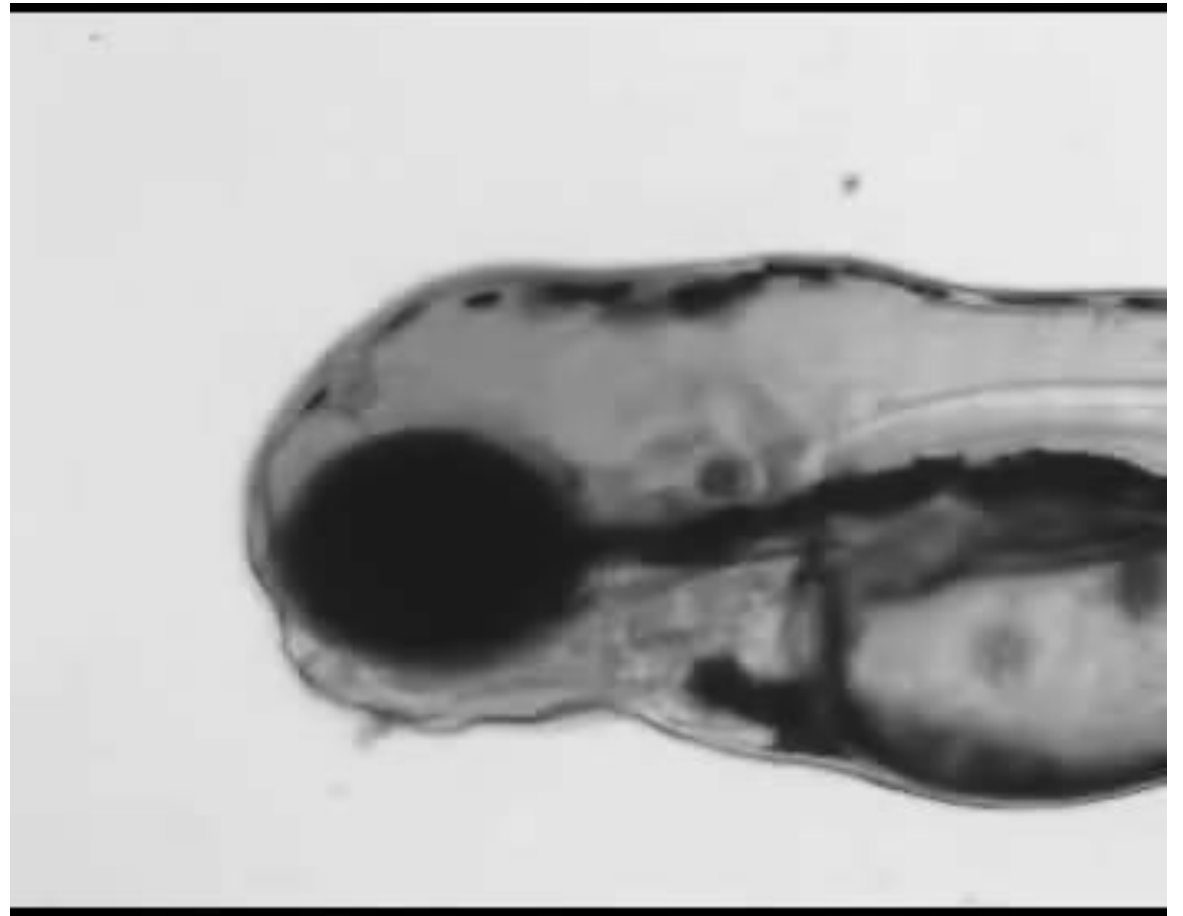

# Data Collection Using BAR Plugin

We can obtain ROI data peaks from the kymograph by making a line followed by the Plot Profile Command **(Ctrl + K)**

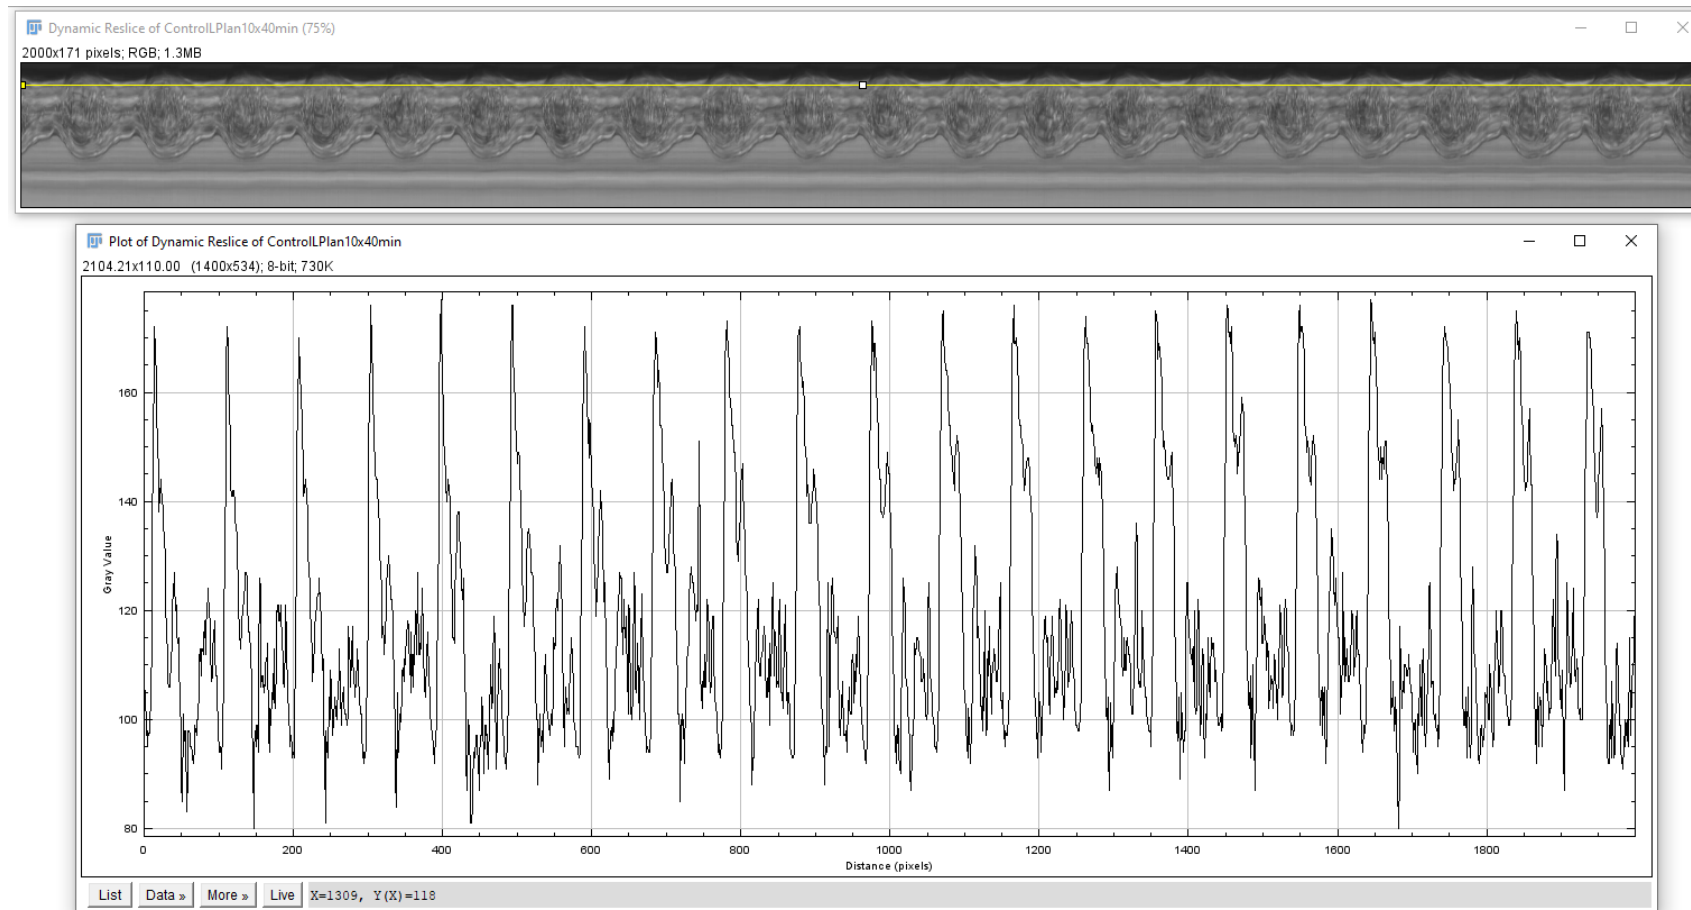

# Caution

- Specified line is subjective, it might show unsuitable result

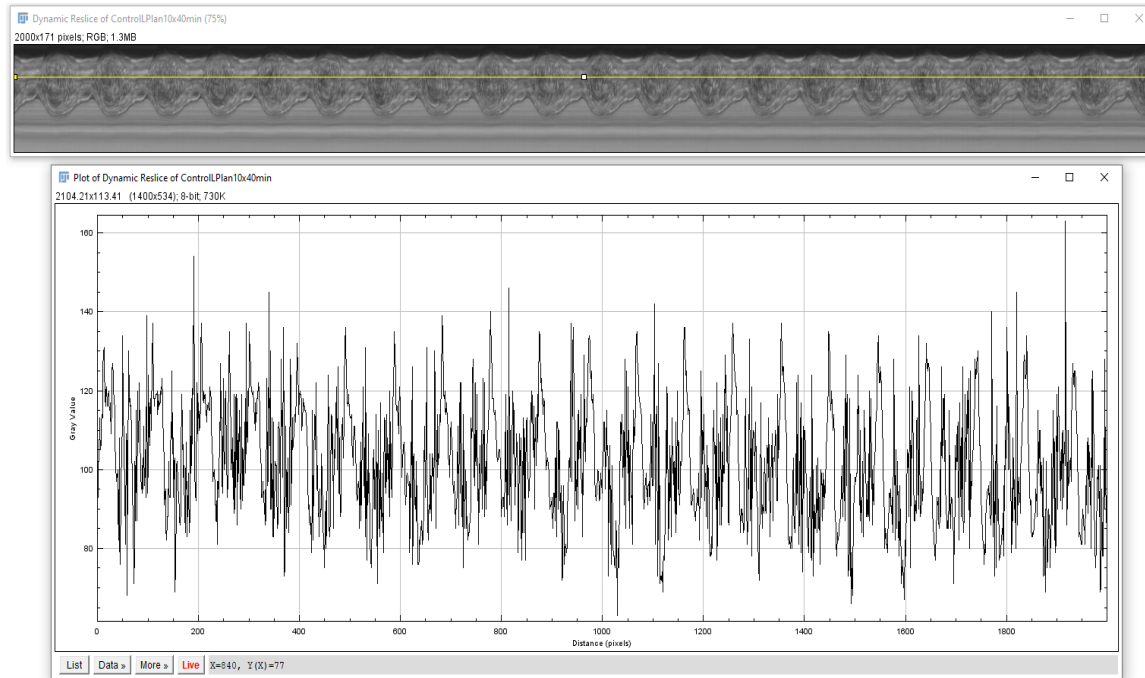

Not Suitable

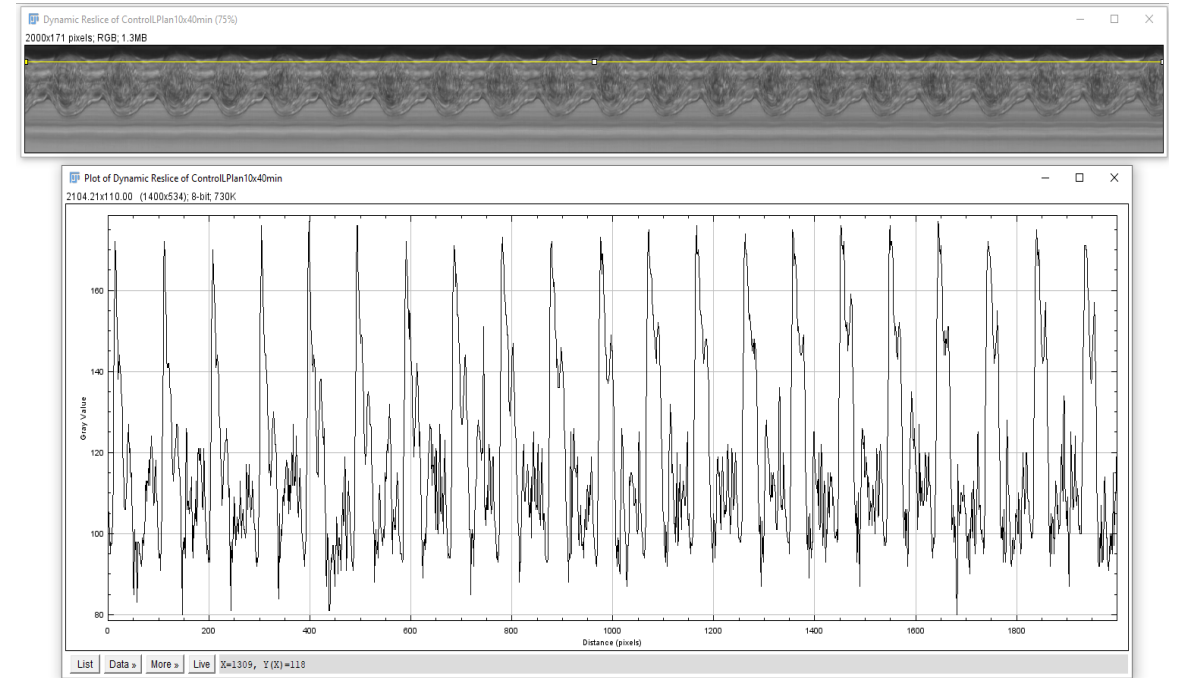

Suitable

# Data Collection Using BAR Plugin

## Smoothed Plot

- The unsuitable reading can be adjusted by using **Smoothed Plot Profile tool** (BAR > Analysis > Smoothed Plot Profile)

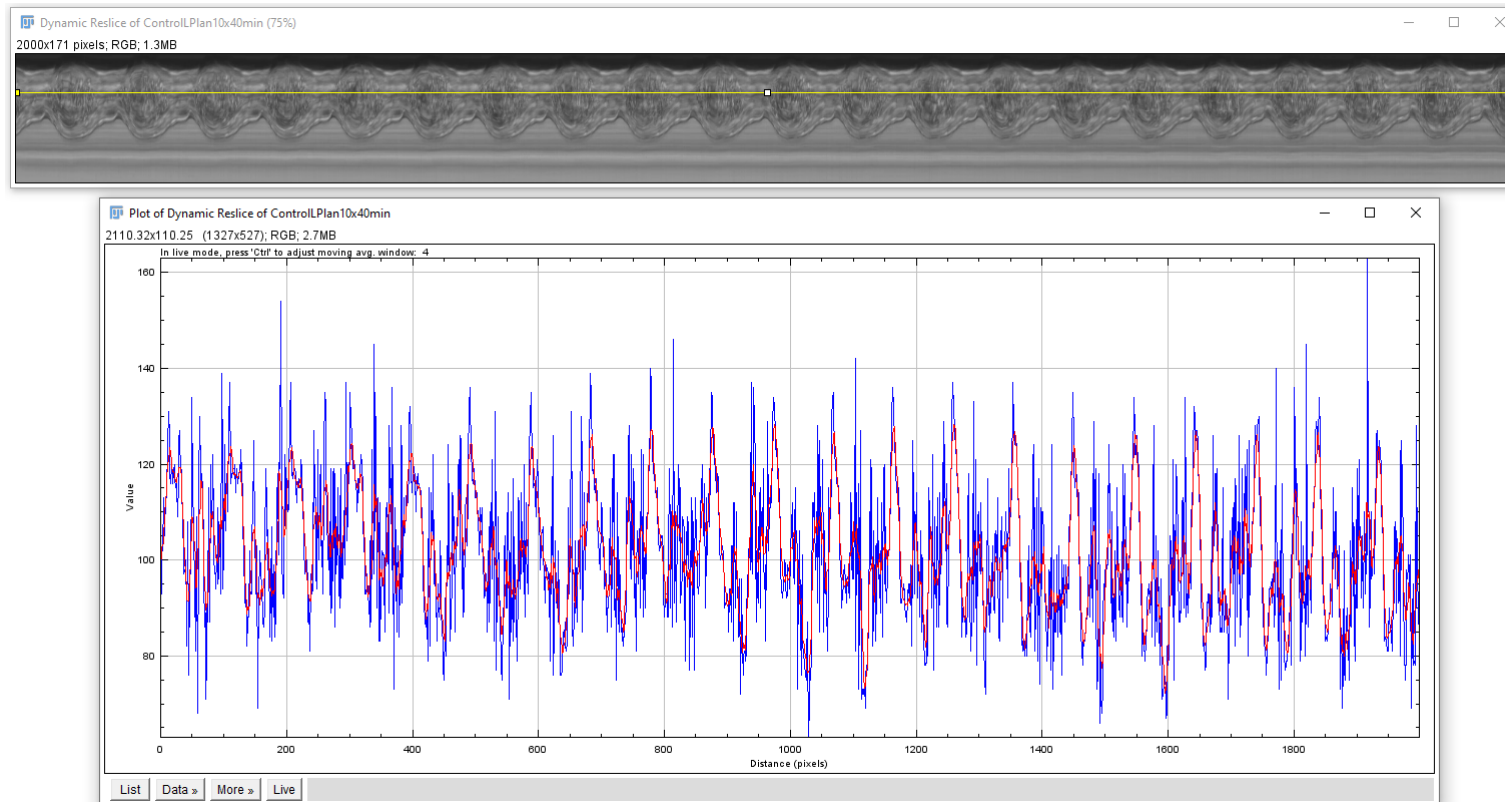

Blue Line = Raw Plot

Red Line = Smoothed Plot Profile

# Data Collection Using BAR Plugin

## Smoothed Plot

- To use the Smoothed Plot for the next step, we made a macro to create a new standalone plot based on the smoothed plot, otherwise BAR Plugin will rather use the Raw Plot for Detection.

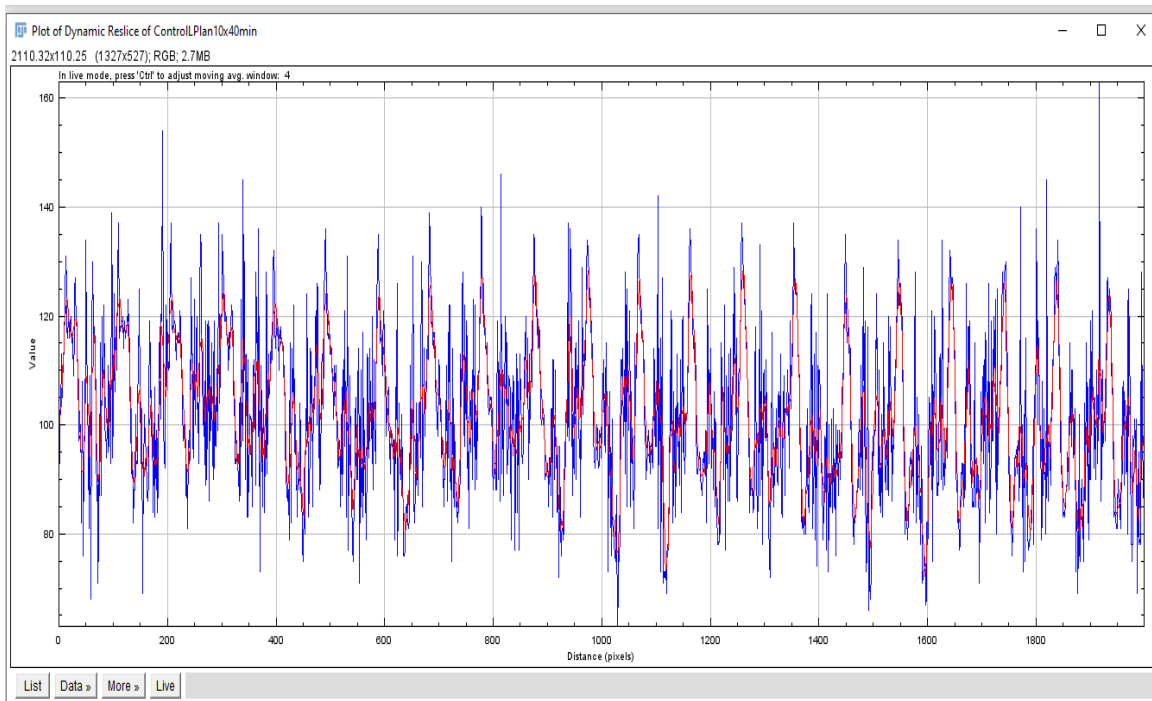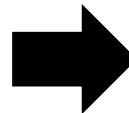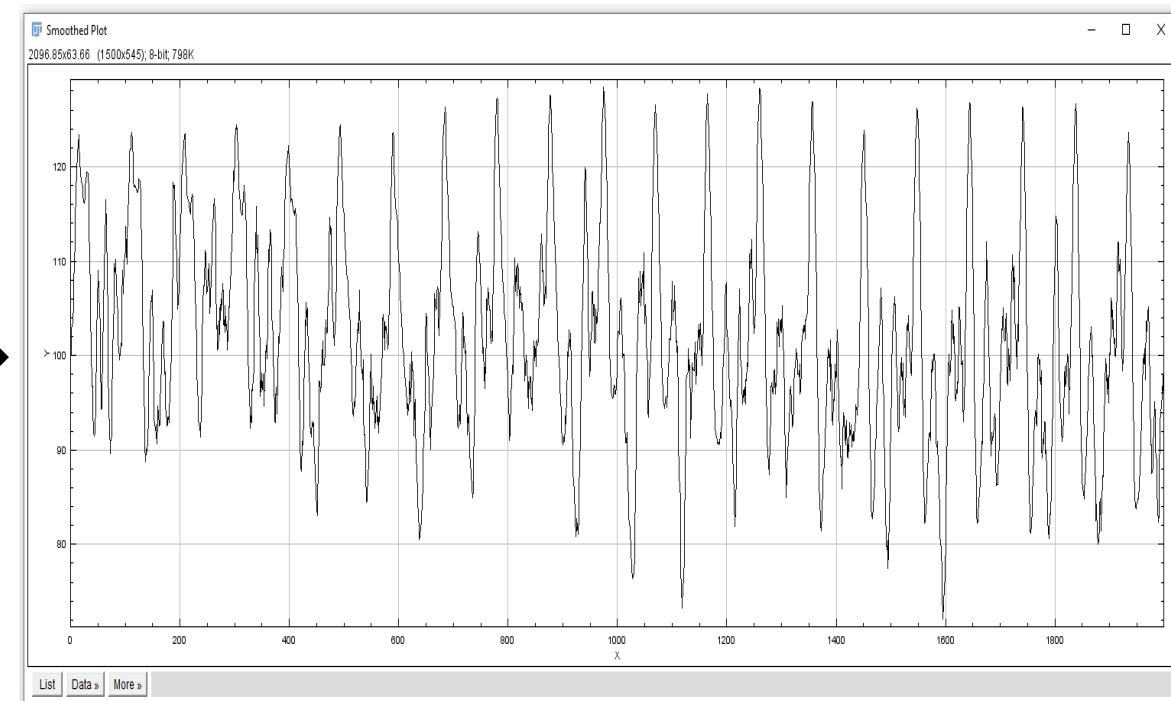

# Data Collection Using BAR Plugin

- To obtain the Peak data, we use the Find Peaks tool (BAR > Data Analysis > Find Peaks) provided by BAR Plugin.

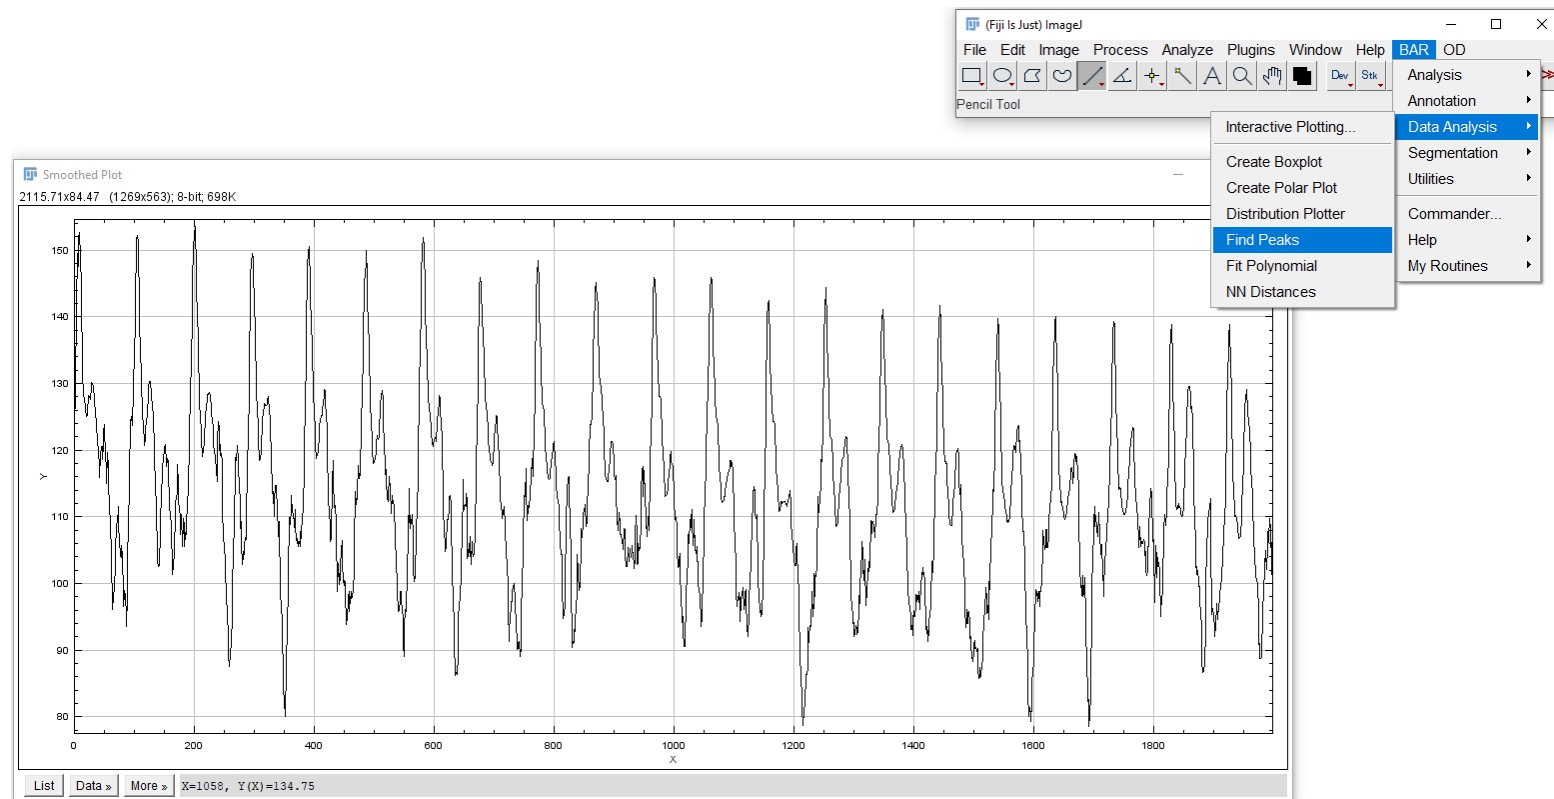

# Data Collection Using BAR Plugin

- Afterwards, a window will pop up. This window is used to set the parameter for the peaks.

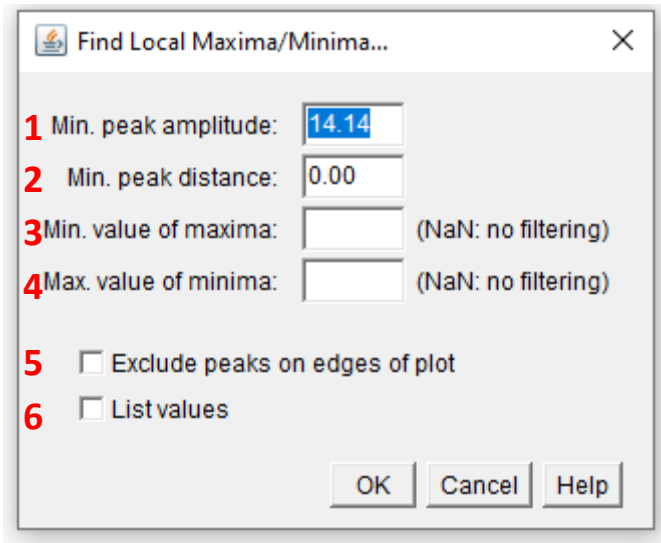

**Min peak amplitude** value is set automatically by the plugin at first. For zebrafish however, we usually adjust it to **double** or **triple** the automatic value, as there is a lot of short peaks.

1. **Min. peak amplitude** : Minimal amplitude of the peak to be considered as a peak, otherwise it will not be recorded
2. **Min. peak distance** : Minimal distance between peaks to be considered as peaks
3. **Min. value of the maxima** : Minimal value of the peak to be considered as the maxima
4. **Max. value of the minima** : Maximal value of the peak to be considered as the minima
5. **Exclude peaks on edges of the plot** : Exclude the peaks on the edges as it might be premature, thus messing up with the data.
6. **List values** : Automatically list all the data.

We usually adjust the **Min. peak amplitude** and check the box for the **exclude peaks** and **list values**, while leaving other options empty unless there are some necessary alteration. Then press **OK**



# Data Collection Using BAR Plugin

- Final result of the BAR Plugin will mark the **maxima** and **minima** of the plot. However, as can be seen below, either the **maxima** or **minima** will have a fuzzy result, therefore only the **maxima** can be used for this example

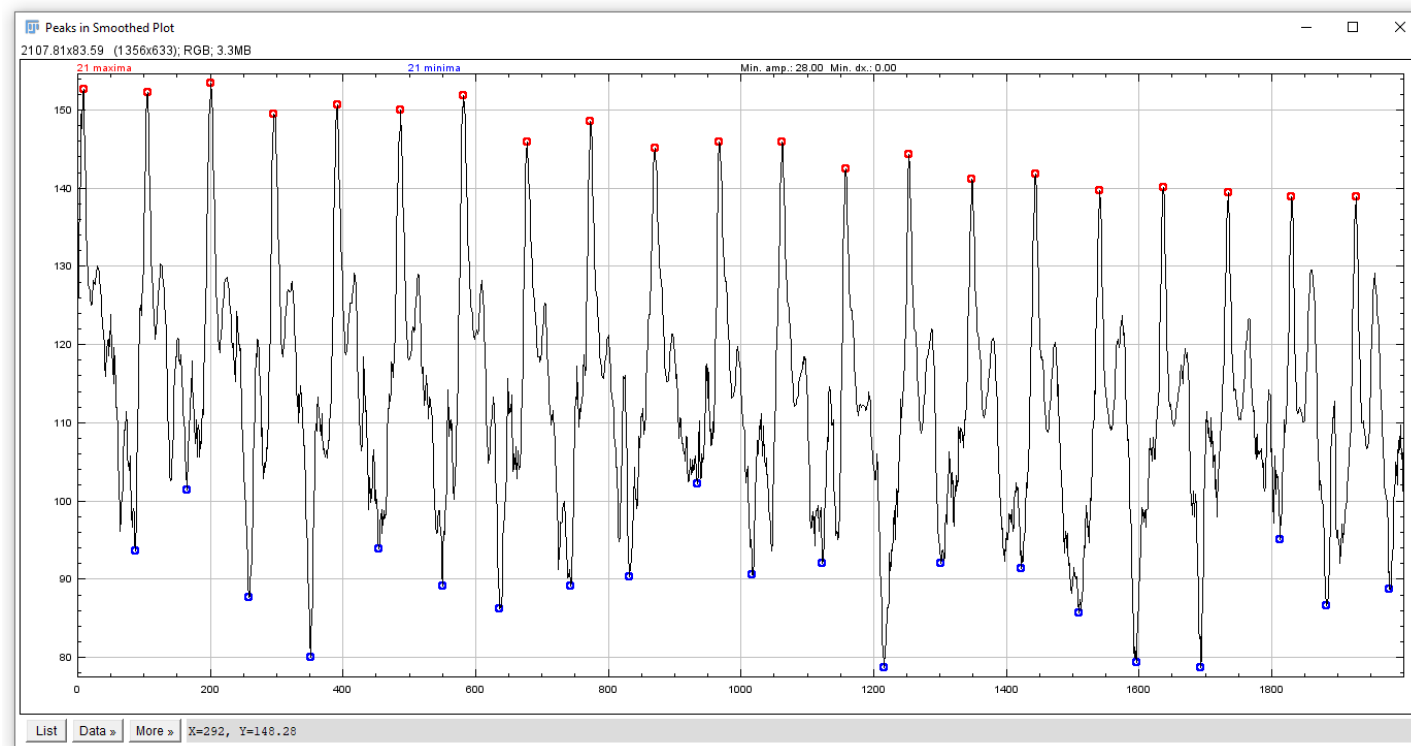

# Data Collection Using BAR Plugin

- Then we get the values from the plot.

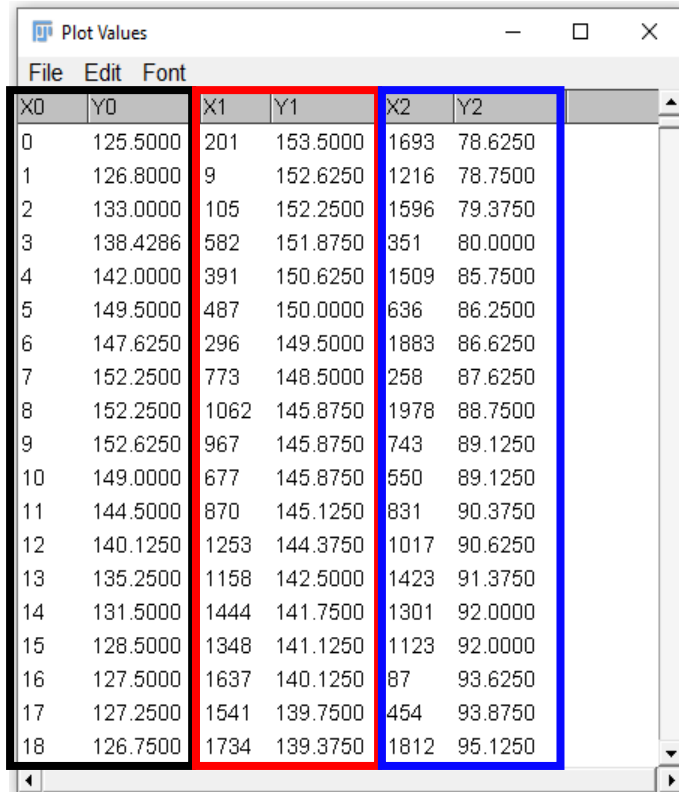

The screenshot shows a window titled 'Plot Values' with a menu bar (File, Edit, Font) and a table of data. The table has six columns: X0, Y0, X1, Y1, X2, and Y2. The first column (X0) is highlighted with a black rectangle. The second column (Y0) is highlighted with a red rectangle. The third column (X1) is highlighted with a red rectangle. The fourth column (Y1) is highlighted with a red rectangle. The fifth column (X2) is highlighted with a blue rectangle. The sixth column (Y2) is highlighted with a blue rectangle. The data is sorted by X0.

| X0 | Y0       | X1   | Y1       | X2   | Y2      |
|----|----------|------|----------|------|---------|
| 0  | 125.5000 | 201  | 153.5000 | 1693 | 78.6250 |
| 1  | 126.8000 | 9    | 152.6250 | 1216 | 78.7500 |
| 2  | 133.0000 | 105  | 152.2500 | 1596 | 79.3750 |
| 3  | 138.4286 | 582  | 151.8750 | 351  | 80.0000 |
| 4  | 142.0000 | 391  | 150.6250 | 1509 | 85.7500 |
| 5  | 149.5000 | 487  | 150.0000 | 636  | 86.2500 |
| 6  | 147.6250 | 296  | 149.5000 | 1883 | 86.6250 |
| 7  | 152.2500 | 773  | 148.5000 | 258  | 87.6250 |
| 8  | 152.2500 | 1062 | 145.8750 | 1978 | 88.7500 |
| 9  | 152.6250 | 967  | 145.8750 | 743  | 89.1250 |
| 10 | 149.0000 | 677  | 145.8750 | 550  | 89.1250 |
| 11 | 144.5000 | 870  | 145.1250 | 831  | 90.3750 |
| 12 | 140.1250 | 1253 | 144.3750 | 1017 | 90.6250 |
| 13 | 135.2500 | 1158 | 142.5000 | 1423 | 91.3750 |
| 14 | 131.5000 | 1444 | 141.7500 | 1301 | 92.0000 |
| 15 | 128.5000 | 1348 | 141.1250 | 1123 | 92.0000 |
| 16 | 127.5000 | 1637 | 140.1250 | 87   | 93.6250 |
| 17 | 127.2500 | 1541 | 139.7500 | 454  | 93.8750 |
| 18 | 126.7500 | 1734 | 139.3750 | 1812 | 95.1250 |

- **Black rectangle** represents the value (Y0) on each points of time (X0) within the plot
- **Red rectangle** represents the time where the **maxima** happens (X1) and the value of the **maxima** (Y1)
- **Blue rectangle** represents the time where **minima** happens (X2) and the value of the **minima** (Y2)

The value is sorted according to X0.

To calculate time difference between beats, we need to sort the data according to X1 or X2 using Microsoft excel. Copy the data using Ctrl + A then Ctrl + C.

# Data Calculation in Microsoft Excel

Sort the **maxima (X1)** data from the lowest to highest, then copy the values for calculation in the next slide.

|    | A  | B        | C    | D       | E    | F       |
|----|----|----------|------|---------|------|---------|
| 1  | X0 | Y0       | X1   | Y1      | X2   | Y2      |
| 2  | 0  | 125.5    | 201  | 153.5   | 1693 | 78.625  |
| 3  | 1  | 126.8    | 9    | 152.625 | 1216 | 78.75   |
| 4  | 2  | 133      | 105  | 152.25  | 1596 | 79.375  |
| 5  | 3  | 138.4286 | 582  | 151.875 | 351  | 80      |
| 6  | 4  | 142      | 391  | 150.625 | 1509 | 85.75   |
| 7  | 5  | 149.5    | 487  | 150     | 636  | 86.25   |
| 8  | 6  | 147.625  | 296  | 149.5   | 1883 | 86.625  |
| 9  | 7  | 152.25   | 773  | 148.5   | 258  | 87.625  |
| 10 | 8  | 152.25   | 1062 | 145.875 | 1978 | 88.75   |
| 11 | 9  | 152.625  | 967  | 145.875 | 743  | 89.125  |
| 12 | 10 | 149      | 677  | 145.875 | 550  | 89.125  |
| 13 | 11 | 144.5    | 870  | 145.125 | 831  | 90.375  |
| 14 | 12 | 140.125  | 1253 | 144.375 | 1017 | 90.625  |
| 15 | 13 | 135.25   | 1158 | 142.5   | 1423 | 91.375  |
| 16 | 14 | 131.5    | 1444 | 141.75  | 1301 | 92      |
| 17 | 15 | 128.5    | 1348 | 141.125 | 1123 | 92      |
| 18 | 16 | 127.5    | 1637 | 140.125 | 87   | 93.625  |
| 19 | 17 | 127.25   | 1541 | 139.75  | 454  | 93.875  |
| 20 | 18 | 126.75   | 1734 | 139.375 | 1812 | 95.125  |
| 21 | 19 | 126      | 1927 | 138.875 | 164  | 101.375 |
| 22 | 20 | 125      | 1830 | 138.875 | 934  | 102.25  |
| 23 | 21 | 125.25   |      |         |      |         |

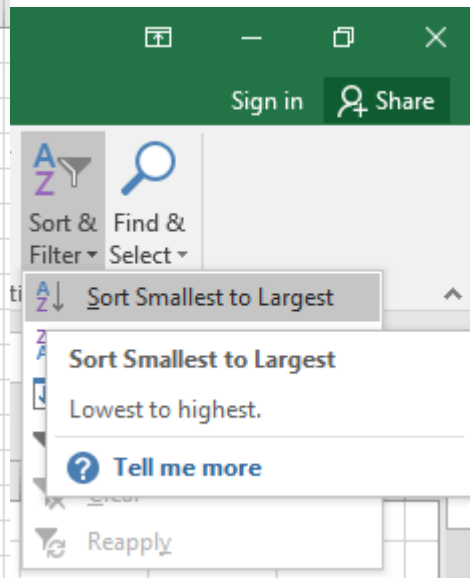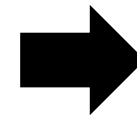

| X0 | Y0       | X1   | Y1      | X2   | Y2      |
|----|----------|------|---------|------|---------|
| 1  | 126.8    | 9    | 152.625 | 1216 | 78.75   |
| 2  | 133      | 105  | 152.25  | 1596 | 79.375  |
| 0  | 125.5    | 201  | 153.5   | 1693 | 78.625  |
| 6  | 147.625  | 296  | 149.5   | 1883 | 86.625  |
| 4  | 142      | 391  | 150.625 | 1509 | 85.75   |
| 5  | 149.5    | 487  | 150     | 636  | 86.25   |
| 3  | 138.4286 | 582  | 151.875 | 351  | 80      |
| 10 | 149      | 677  | 145.875 | 550  | 89.125  |
| 7  | 152.25   | 773  | 148.5   | 258  | 87.625  |
| 11 | 144.5    | 870  | 145.125 | 831  | 90.375  |
| 9  | 152.625  | 967  | 145.875 | 743  | 89.125  |
| 8  | 152.25   | 1062 | 145.875 | 1978 | 88.75   |
| 13 | 135.25   | 1158 | 142.5   | 1423 | 91.375  |
| 12 | 140.125  | 1253 | 144.375 | 1017 | 90.625  |
| 15 | 128.5    | 1348 | 141.125 | 1123 | 92      |
| 14 | 131.5    | 1444 | 141.75  | 1301 | 92      |
| 17 | 127.25   | 1541 | 139.75  | 454  | 93.875  |
| 16 | 127.5    | 1637 | 140.125 | 87   | 93.625  |
| 18 | 126.75   | 1734 | 139.375 | 1812 | 95.125  |
| 20 | 125      | 1830 | 138.875 | 934  | 102.25  |
| 19 | 126      | 1927 | 138.875 | 164  | 101.375 |

# Data Calculation in Microsoft Excel

|    | A      | B         | C               | D                  | E            | F            | G                 | H                    | I                    | J                    |
|----|--------|-----------|-----------------|--------------------|--------------|--------------|-------------------|----------------------|----------------------|----------------------|
| 1  | Atrium | Ventricle | Atrium Interval | Ventricle Interval | A-V Interval | V-A Interval | Atrium heart rate | Ventricle heart rate | Average A-V Interval | Average V-A Interval |
| 2  | 66     | 105       | 0.465           | 0.48               | 0.195        | 0.27         | 125.5506608       | 125.1372119          | 0.20210526           | 0.27578947           |
| 3  | 159    | 201       | 0.49            | 0.475              | 0.21         | 0.28         |                   |                      |                      |                      |
| 4  | 257    | 296       | 0.47            | 0.475              | 0.195        | 0.275        |                   |                      |                      |                      |
| 5  | 351    | 391       | 0.485           | 0.48               | 0.2          | 0.285        |                   |                      |                      |                      |
| 6  | 448    | 487       | 0.485           | 0.475              | 0.195        | 0.29         |                   |                      |                      |                      |
| 7  | 545    | 582       | 0.46            | 0.475              | 0.185        | 0.275        |                   |                      |                      |                      |
| 8  | 637    | 677       | 0.475           | 0.48               | 0.2          | 0.275        |                   |                      |                      |                      |
| 9  | 732    | 773       | 0.495           | 0.485              | 0.205        | 0.29         |                   |                      |                      |                      |
| 10 | 831    | 870       | 0.485           | 0.485              | 0.195        | 0.29         |                   |                      |                      |                      |
| 11 | 928    | 967       | 0.465           | 0.475              | 0.195        | 0.27         |                   |                      |                      |                      |
| 12 | 1021   | 1062      | 0.485           | 0.48               | 0.205        | 0.28         |                   |                      |                      |                      |
| 13 | 1118   | 1158      | 0.475           | 0.475              | 0.2          | 0.275        |                   |                      |                      |                      |
| 14 | 1213   | 1253      | 0.47            | 0.475              | 0.2          | 0.27         |                   |                      |                      |                      |
| 15 | 1307   | 1348      | 0.47            | 0.48               | 0.205        | 0.265        |                   |                      |                      |                      |
| 16 | 1401   | 1444      | 0.49            | 0.485              | 0.215        | 0.275        |                   |                      |                      |                      |
| 17 | 1499   | 1541      | 0.485           | 0.48               | 0.21         | 0.275        |                   |                      |                      |                      |
| 18 | 1596   | 1637      | 0.475           | 0.485              | 0.205        | 0.27         |                   |                      |                      |                      |
| 19 | 1691   | 1734      | 0.485           | 0.48               | 0.215        | 0.27         |                   |                      |                      |                      |
| 20 | 1788   | 1830      | 0.47            | 0.485              | 0.21         | 0.26         |                   |                      |                      |                      |
| 21 | 1882   | 1927      |                 |                    |              |              |                   |                      |                      |                      |

A. Peaks obtained in Atrium

B. Peaks obtained in Ventricle

C and D. Interval between peaks in Atrium and Ventricle respectively in seconds

Equation :  $\text{Peak}_{n+1} - \text{Peak}_n / 200$  (video is 200 fps)

E. Interval from Atrium peaks to Ventricle peaks

F. Interval from Ventricle peaks to Atrium peaks

E and F are used for determining pumping regularity between chamber

# Other Data Collection

- Collection of data according to below slides to calculate ejection fraction, shortening fraction, stroke volume, and cardiac output

# Other Data Collection

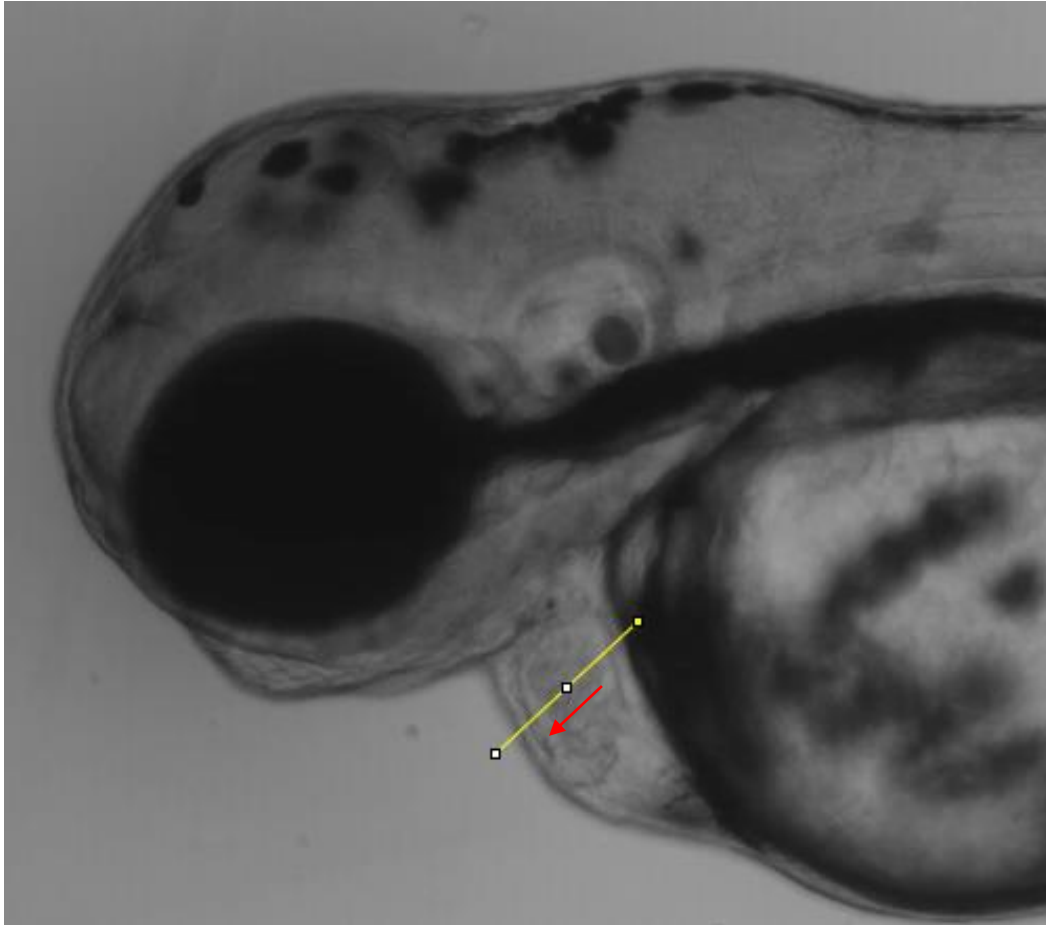

**Ventricular short axis**

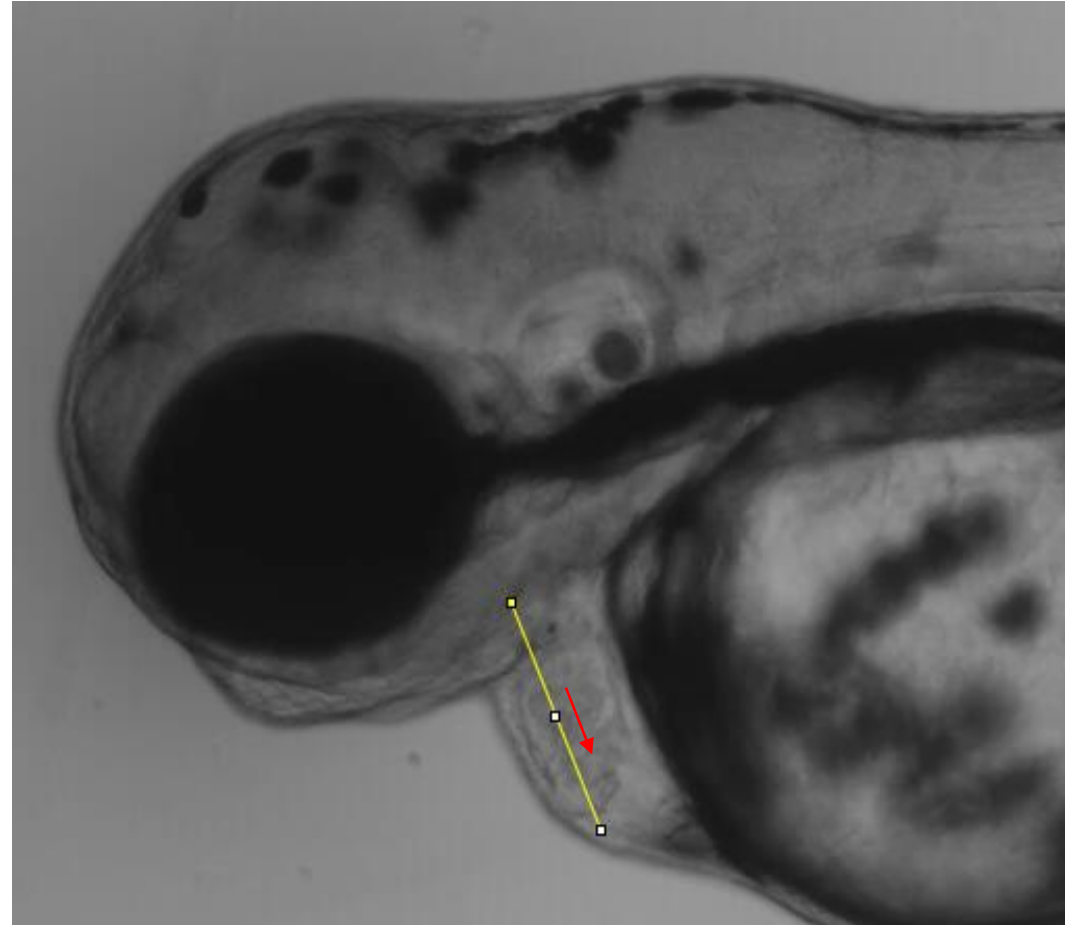

**Ventricular long axis**

# Other Data Collection

## Ventricular short axis Kymograph

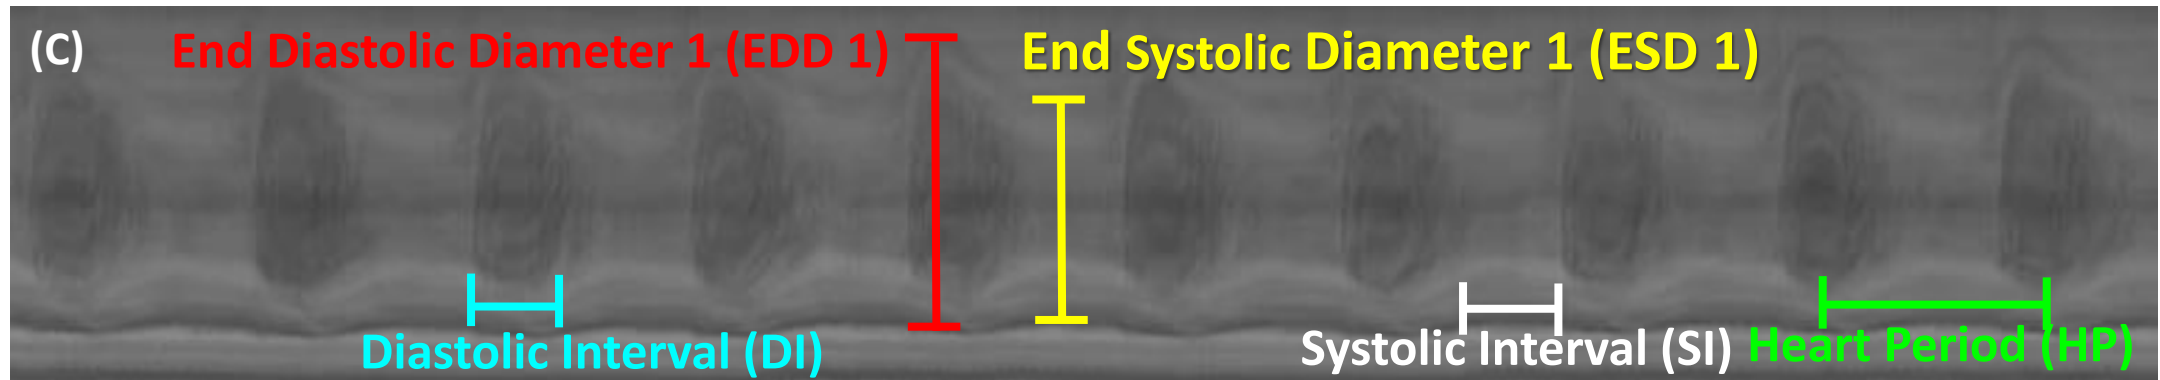

## Ventricular long axis Kymograph

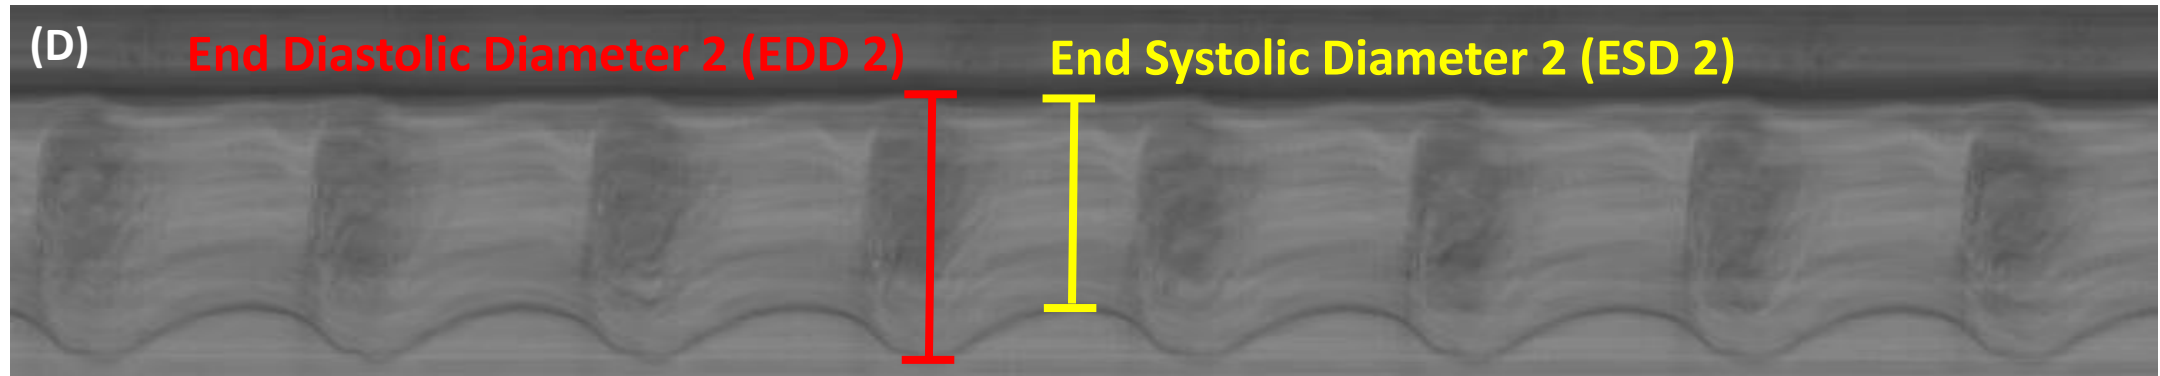

# Other Data Collection

- End Diastolic Diameter (EDD) and End Systolic Diameter (ESD) data (1 & 2) can be obtained by manually measuring the length of the heart when it is at the biggest and the smallest on both the short- and long-axis. In addition, it is necessary to set the scale to obtain the data in desired unit using calibration scale.
- Diastolic interval (DI), Systolic interval (SI), and Heart period (HP) can be obtained by measuring the heart when they are full of blood, empty of blood, and the interval between beat respectively. This measurement can be done by measuring horizontally such as depicted in the last slide. The unit for this measurement is frame and can be converted to seconds or minutes according to the refresh rate of the recording equipment.



# Set Scale

- This step is necessary to automatically convert length unit from pixel to mm or cm during measurement process
- The Set Scale menu can be accessed from Analyze > Set Scale
- The calibration scale is a circular shape object with diameter of **0.15 mm**
- The scale can be set by changing the **Known distance** and **Unit of length** in Set Scale menu according to the calibration scale

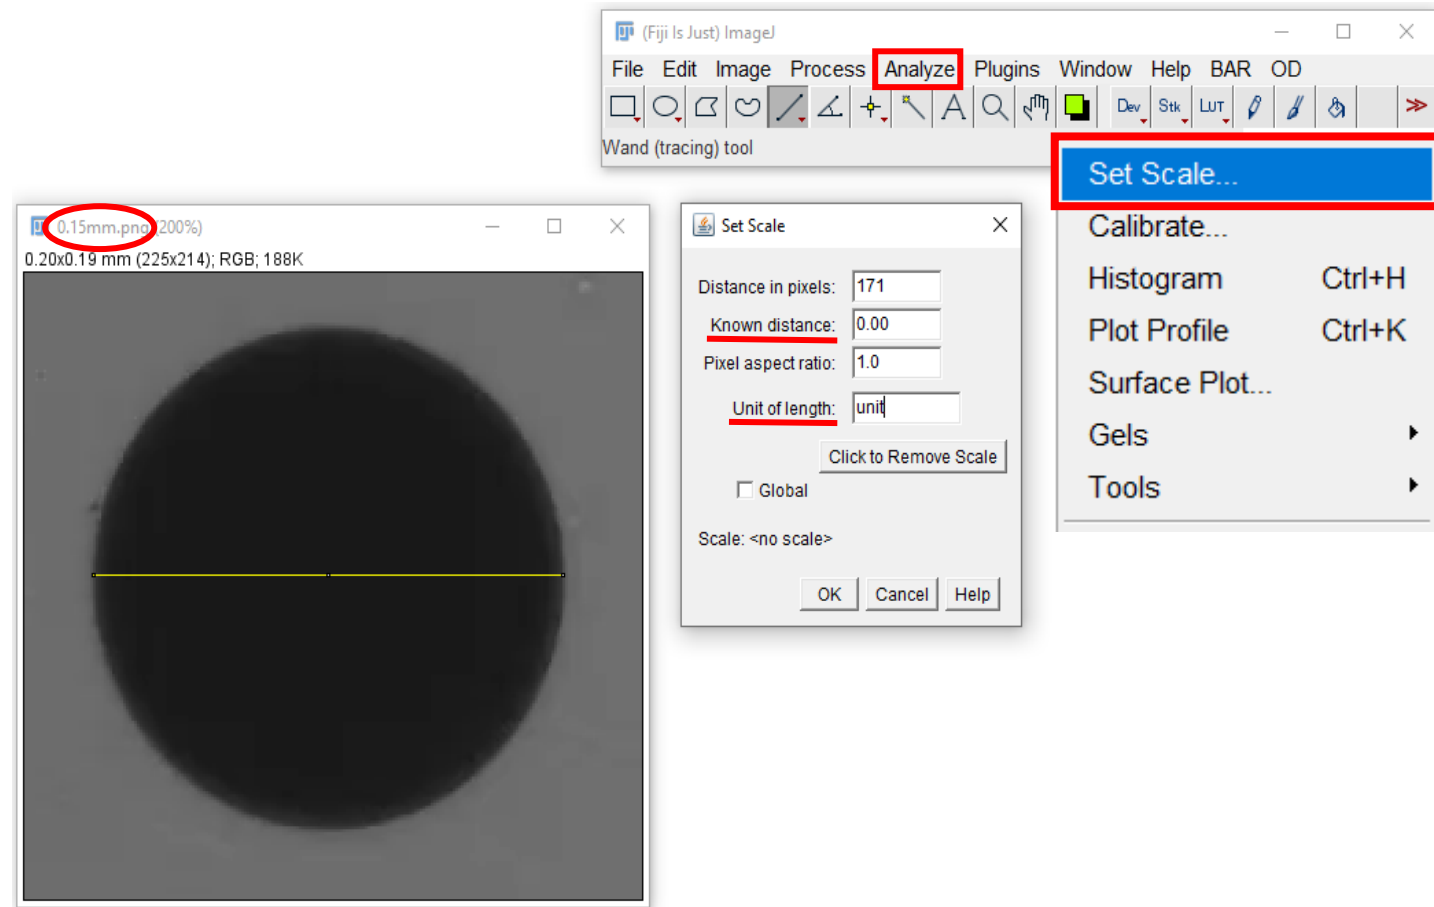

# Other Data Collection

From the data collected in previous slides, we are able to calculate data as presented below

| A                           | B                            | C                           | D                            | E                       | F                       | G                                             | H                       | I                | J              | K                     | L                       |
|-----------------------------|------------------------------|-----------------------------|------------------------------|-------------------------|-------------------------|-----------------------------------------------|-------------------------|------------------|----------------|-----------------------|-------------------------|
| EDV                         |                              | ESV                         |                              | EDV ( $\mu\text{m}^3$ ) | ESV ( $\mu\text{m}^3$ ) | Stroke Volume ( $\mu\text{m}^3/\text{beat}$ ) | Stroke Volume (pL/beat) | Heart rate (BPM) | Cardiac Output | Ejection Fraction (%) | Shortening Fraction (%) |
| Long Axis ( $\mu\text{m}$ ) | Short Axis ( $\mu\text{m}$ ) | Long Axis ( $\mu\text{m}$ ) | Short Axis ( $\mu\text{m}$ ) |                         |                         |                                               |                         |                  |                |                       |                         |
| 171.5039578                 | 93.22779244                  | 48.37291117                 | 121.3720317                  | 1,435,066.72            | 372,921.88              | 1,062,144.83                                  | 1,062.14                | 125.14           | 132,913.84     | 74.01                 | 29.23                   |

**A, B, C, and D** are data collected from slide **31** and **32**

**E and F** are **End Diastolic Volume** and **End Systolic Volume** respectively with the equation :

$$\frac{1}{6} \times \pi \times \text{Long Axis} \times \text{Short Axis}^2$$

Assuming the heart is spheroid in shape with missing axis having the same length as the short axis.

**G and H** are Stroke Volume = EDV – ESV

**I** is the Heart rate calculated using Microsoft excel

**J** is the Cardiac Output = Stroke Volume x Heart rate, as it shows the volume of blood pumped within a minute

**K** Ejection Fraction is percent heart volume changes during diastole and systole

$$\text{Ejection Fraction} = \frac{\text{EDV} - \text{ESV}}{\text{EDV}} \times 100\%$$

**L** Shortening Fraction is percent heart short axis changes during diastole and systole according to

$$\text{Ejection Fraction} = \frac{\text{EDV Short Axis} - \text{ESV Short Axis}}{\text{EDV Short Axis}} \times 100\%$$

# Installation of ImageJ macro

- Add the macro to the ImageJ > Plugin > Macros folder.
- Open ImageJ then install the macro (Plugins > Macros > Install...) by locating the macro in previous Macros folder.

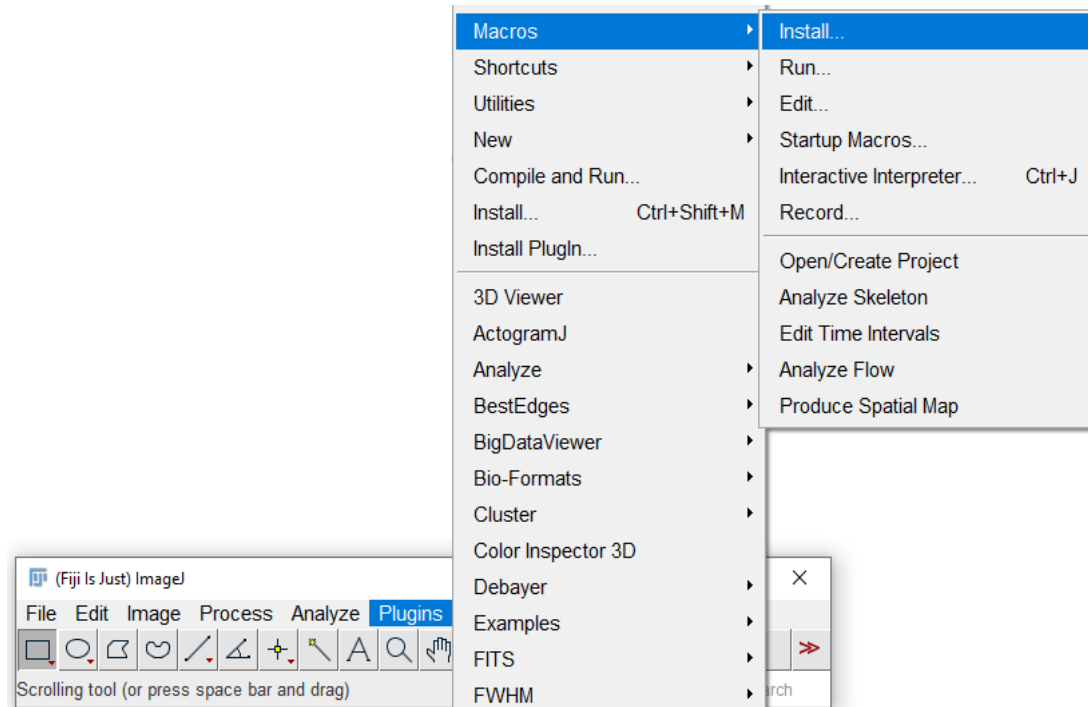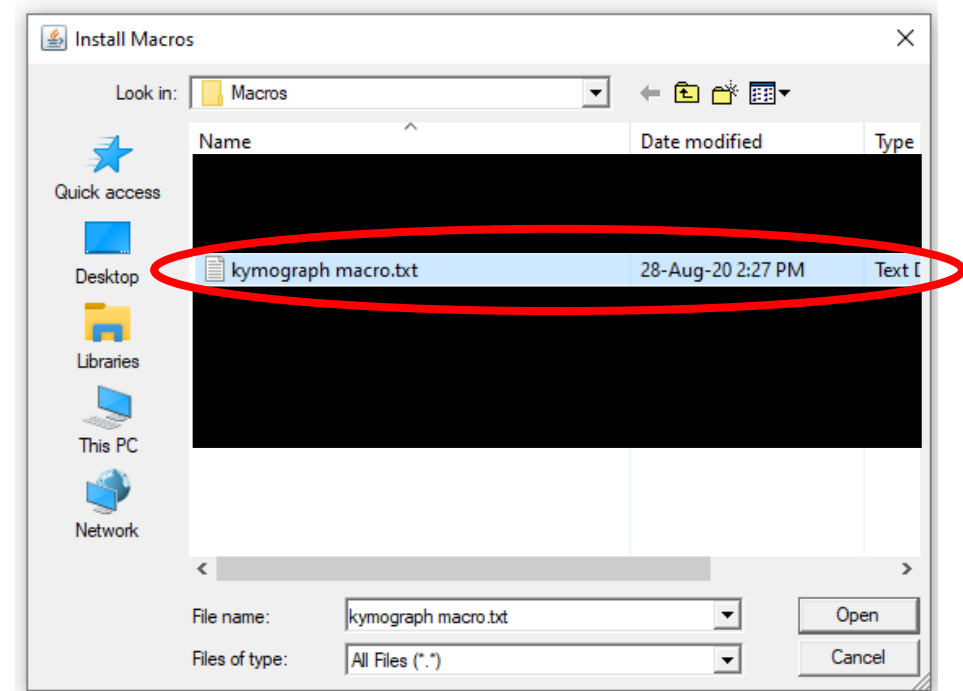

# Macro

Our macro was made to help users in obtaining the data.

These are the command strings contained in the **kymograph macro.txt**

The first macro is to make kymograph using ImageJ **Dynamic Reslice** and **rotating** the kymograph by **90 degrees**. This macro is bound to **F2** key on user's keyboard, which can be modified by changing it to the user's preference.

```
macro "Make Kymograph [F2]" {  
  
    run("  
Dynamic Reslice", "rotate");  
}
```

# Macro

The second macro is to enable users' to use smoothed plot by creating a new plot based on the plot made by the BAR Plugin. This macro is bound to F3 key

```
macro "Smoothed Plot [F3]" {  
  run("Smoothed Plot Profile", "window=4 pixelunits=true");  
  waitForUser("Adjust ROI location on Kymograph, Select Plot Window, Then Click OK");  
  Plot.showValues("Plot Values");  
  x1 = Table.getColumn("X0");  
  Y1 = Table.getColumn("Y1");  
  xValues = x1;  
  yValues = Y1;  
  Plot.create("Smoothed Plot", "X", "Y", xValues, yValues);  
  Plot.setLineWidth(1);  
  Plot.show();  
}
```

# Macro

The third macro is to run Find Peaks, bound to F4 key.

```
macro "Find Peaks [F4]" {  
  
    run("Find Peaks");  
}
```

# Macro

The last macro is to close all windows made during data gathering in ImageJ, bound to F5 key.

```
macro "Close All Windows [F5]" {  
    while (nImages>0) {  
        selectImage(nImages);  
        close();  
    }  
}
```
