# Supplementary material
Source: MDPI journal article supplement (https://www.mdpi.com/2411-5134/6/1/8)
Supplement: s1 [file s1]

Archive with 4 entries (4 files):
- File 1_Kymograph SOP-edit.pdf
- File 2_kymograph macro.txt
- File 3_Sample video-Zebrafish.mp4
- File 4_Sample video-Daphnia magna.mp4
